# Supplementary material for: Isolation and characterization of copper(iii) trifluoromethyl complexes and reactivity studies of aerobic trifluoromethylation of arylboronic acids
Source: Royal Society of Chemistry journal article supplement (doi:10.1039/c6ra10302b), 2016-01-01
Supplement: c6ra10302b1.pdf [file c6ra10302b1.pdf]

Electronic Supplementary Information for

**Isolation and Characterization of Copper(III) Trifluoromethyl  
Complexes and Reactivity Studies of Aerobic Trifluoromethylation of  
Arylboronic Acids**

Song-Lin Zhang\* and Wen-Feng Bie

*The Key Laboratory of Food Colloids and Biotechnology, Ministry of Education,  
School of Chemical and Material Engineering, Jiangnan University, Wuxi 214122,  
Jiangsu Province, China*

E-mail: slzhang@jiangnan.edu.cn

**Table of Contents**

|                                                                                        |     |
|----------------------------------------------------------------------------------------|-----|
| 1. General experimental details-----                                                   | S1  |
| 2. Procedures for the synthesis and characterization of complexes <b>1-5</b> -----     | S1  |
| 3. NMR spectra for the key complexes <b>2-4</b> -----                                  | S5  |
| 4. Crystallographic study-----                                                         | S10 |
| 5. <sup>19</sup> F NMR monitoring of the reaction course -----                         | S42 |
| 6. Reaction mechanism relevant -----                                                   | S44 |
| 7. Reactivity studies of <b>2</b> and <b>3</b> with boronic acids -----                | S45 |
| 7.1 Optimization of conditions for reaction of <b>3</b> with <b>6a</b> (Table 1)-----  | S45 |
| 7.2 General procedures for reaction of <b>3</b> with various boronic acids (Table 2)-- | S47 |
| 7.3 Reaction of <b>2</b> with boronic acids-----                                       | S50 |

## 1. General experimental details

All reactants and solvents were purchased commercially except complex **1**. CH<sub>2</sub>Cl<sub>2</sub> and DMF solvents were simply dried over Na<sub>2</sub>SO<sub>4</sub> before use. Other reactants were used as received without further purification. All the reactions were performed in a Schlenk tube under N<sub>2</sub> or O<sub>2</sub> atmosphere which was realized through evacuation/backfill techniques three times. For reactions involving AgF, a tinfoil was used to wrap the Schlenk tube to avoid the interference of visible light. NMR spectra were recorded on a Bruker Avance III HD 400 MHz spectrometer. Chemical shifts are reported in ppm and referenced to residual solvent peaks or TMS. Coupling constants are reported in Hertz. Elemental analyses were performed by the Analytic Laboratory of Jiangnan University.

## 2. Procedures for the synthesis and characterization of complexes 1-5

### (PPh<sub>3</sub>)<sub>3</sub>CuBr

In an Erlenmeyer flask, methanol (150 mL) was heated to boiling and triphenyl phosphine (9.98 g, 38.1 mmol) was added slowly to the stirring methanol. After complete dissolution, CuBr<sub>2</sub> (2.24 g, 10.0 mmol) was slowly added in small portions. Upon addition of copper bromide, a white precipitate was formed. After all of CuBr<sub>2</sub> added, the mixture was stirred for 30 min and then cooled down to room temperature. The precipitate was filtered and washed with ethanol and ether, and dried in vacuum to give (PPh<sub>3</sub>)<sub>3</sub>CuBr as a white powder in a yield of 7.876 g (85%).

### (phen)Cu(PPh<sub>3</sub>)Br (**1**)

In an Erlenmeyer flask, (PPh<sub>3</sub>)<sub>3</sub>CuBr (4.65 g, 5 mmol) was dissolved in 50 mL of chloroform at room temperature. 1,10-phenanthroline (900 mg, 5 mmol) was then added to the reaction mixture. The colorless solution immediately turned orange. The contents of the flask were allowed to stir at room temperature for 30 min and the solvent was removed in vacuo. The resulting orange solid was dissolved in 80 mL of dichloromethane and layered with 200 mL of ether. The precipitate was collected on the Buchner funnel, washed with 100mL of ether and dried in vacuum to give (phen)Cu(PPh<sub>3</sub>)Br (**1**) as an orange solid in a yield of 2.573 g (88%).

**$[(\text{phen})\text{Cu}^{\text{I}}(\text{PPh}_3)_2]^+[\text{Cu}^{\text{III}}(\text{CF}_3)_4]^-$  (**2**) and  $(\text{phen})\text{Cu}^{\text{III}}(\text{CF}_3)_3$  (**3**)**

Into a 25-mL Schlenk tube equipped with a stir bar and wrapped with tinfoil (to avoid possible interference of visible light with AgF) was added phenCu(PPh<sub>3</sub>)Br (586 mg, 1 mmol,) and AgF (381 mg, 3 mmol) at room temperature. The air in the Schlenk tube was evacuated and backfilled with dry nitrogen three times. CH<sub>2</sub>Cl<sub>2</sub> (10 mL) was then added by syringe and the contents were vigorously stirred for 30 minutes. TMSCF<sub>3</sub> (426 mg, 3 mmol) was then slowly added by syringe. The resulting mixture was further stirred for 18 hours at room temperature under nitrogen. The crude mixture was separated by filtration and washed with CH<sub>2</sub>Cl<sub>2</sub> (10 mL). The combined filtrate and the washings were evaporated to dryness. The solid residue was treated with CH<sub>2</sub>Cl<sub>2</sub> (10 mL) and evaporated with silica gel. The crude mixture was purified by flash silica gel column chromatography under air with petroleum ether (PE) /ethylacetate (EA) (v/v = 2:1) as eluent to give phenCu(CF<sub>3</sub>)<sub>3</sub> (**3**) as yellow solid in a yield of 140 mg (31%). Then the flash silica gel column chromatography was washed with CH<sub>2</sub>Cl<sub>2</sub>. The washings were reduced in volume on a rotary evaporator to give yellow solid. The solid residue was treated with CH<sub>2</sub>Cl<sub>2</sub> (3 mL) followed by hexane (6 mL) and stored in refrigerator. Yellow crystals were separated by filtration, washed with hexane (4 x 1 mL), and dried under vacuum. Complex **2** was thus obtained as yellow solid in a yield of 164 mg (30%). Complexes **2** and **3** were stable under air for at least two weeks.

**$[(\text{phen})\text{Cu}^{\text{I}}(\text{PPh}_3)_2]^+[\text{Cu}^{\text{III}}(\text{CF}_3)_4]^-$  (**2**):** <sup>1</sup>H NMR (400 MHz, CD<sub>2</sub>Cl<sub>2</sub>): δ 8.74 (d, *J* = 4.4 Hz, 2H), 8.50 (d, *J* = 8.0 Hz, 2H), 8.03 (s, 2H), 7.75 (dd, *J* = 7.9, 4.7 Hz, 2H), 7.38 (t, *J* = 7.6 Hz, 6H), 7.21 (t, *J* = 7.6 Hz, 12H), 7.14 (d, *J* = 7.2 Hz, 12H). <sup>19</sup>F NMR (376 MHz, CD<sub>2</sub>Cl<sub>2</sub>) δ: -34.6 (s). <sup>31</sup>P NMR (162 MHz, CD<sub>2</sub>Cl<sub>2</sub>) δ: 3.0 (br). Anal. Calc. for C<sub>52</sub>H<sub>38</sub>F<sub>12</sub>N<sub>2</sub>P<sub>2</sub>Cu<sub>2</sub>: C, 56.37, H, 3.46, N, 2.53; Found: C, 56.77, H, 3.69, N, 2.73.

**$(\text{phen})\text{Cu}^{\text{III}}(\text{CF}_3)_3$  (**3**):** <sup>1</sup>H NMR (400 MHz, CD<sub>2</sub>Cl<sub>2</sub>): δ 9.47 (dd, *J* = 4.8, 1.3 Hz, 2H), 8.67 (dd, *J* = 8.2, 1.4 Hz, 2H), 8.10 (s, 2H), 8.05 (dd, *J* = 8.2, 4.8 Hz, 2H). <sup>19</sup>F NMR (376 MHz, CD<sub>2</sub>Cl<sub>2</sub>): δ -24.4 (septet, *J* = 9.6 Hz), -37.4 (quartet, *J* = 9.6 Hz). Anal.

Calc. for  $C_{15}H_8Cu_1F_9N_2$ : C, 39.97, H, 1.79, N, 6.21; Found: C, 40.36, H, 2.00, N, 6.33.

**An alternative synthesis of (phen)Cu<sup>III</sup>(CF<sub>3</sub>)<sub>3</sub> (3) and (bpy)Cu<sup>III</sup>(CF<sub>3</sub>)<sub>3</sub> (4):** Into a 25-mL Schlenk tube equipped with a stir bar and wrapped with tinfoil (to avoid possible interference of visible light with AgF) was added CuI (190 mg, 1 mmol), phen (180 mg, 1 mmol) or bpy (156 mg, 1 mmol) and AgF (508 mg, 4 mmol) at room temperature. The tube was then sealed with Teflon. The air in the tube was evacuated and backfilled with dry nitrogen three times. DMF (3 mL) was added by syringe and the contents were vigorously stirred for 30 minutes. CF<sub>3</sub>SiMe<sub>3</sub> (852 mg, 6 mmol) was subsequently slowly added into the tube by syringe. The resulting mixture was further stirred for 18 hours at room temperature under nitrogen. The crude mixture was diluted with CH<sub>2</sub>Cl<sub>2</sub> (10 mL), separated by filtration and washed with CH<sub>2</sub>Cl<sub>2</sub> (5 mL). The combined filtrate and the washings were washed with water (5 mL) three times. Then the organic layer was evaporated with silica gel. The crude mixture was purified by flash column chromatography on silica gel to give (phen)Cu(CF<sub>3</sub>)<sub>3</sub> (3) (eluent: PE/EA (v/v = 2:1)) as yellow solids in a yield of 283 mg (63 %) or (bpy)Cu(CF<sub>3</sub>)<sub>3</sub> (4) (eluent: CH<sub>2</sub>Cl<sub>2</sub>) as yellow solids in a yield of 303 mg (71 %).

**(bpy)Cu(CF<sub>3</sub>)<sub>3</sub> (4):** <sup>1</sup>H NMR (400 MHz, d<sup>6</sup>-DMSO) δ: 9.25 (d, *J* = 5.0 Hz, 2H), 8.81 (d, *J* = 8.1 Hz, 2H), 8.39 (td, *J* = 7.9, 1.4 Hz, 2H), 7.92 (dd, *J* = 6.8, 5.5 Hz, 2H). <sup>19</sup>F NMR (376 MHz, d<sup>6</sup>-DMSO) δ: -24.0 (sept, *J* = 9.2 Hz), -36.1 (q, *J* = 9.2 Hz).

#### **[(Ph<sub>3</sub>P)<sub>3</sub>Ag<sub>2</sub>Br<sub>2</sub>] (5)**

Into a 25-mL Schlenk tube equipped with a stir bar and wrapped with tinfoil was added phenCu(PPh<sub>3</sub>)Br (586 mg, 1 mmol) and AgF (381 mg, 3 mmol) at room temperature. The air in the Schlenk was evacuated and backfilled with dry nitrogen three times. CH<sub>2</sub>Cl<sub>2</sub> (10 mL) was then added into the tube by syringe. The resulting mixture was stirred at room temperature for 18 h under nitrogen. The resulting mixture was separated by filtration and washed with CH<sub>2</sub>Cl<sub>2</sub> (5 mL). The combined filtrate and the washings were evaporated to dryness. The solid residue was treated

with CH<sub>2</sub>Cl<sub>2</sub> (5 mL) followed by hexane (15 mL). The pale yellow crystals were separated by filtration, washed with hexane (4 x 5 mL), and dried under vacuum. Crystals of complex [(Ph<sub>3</sub>P)<sub>3</sub>Ag<sub>2</sub>Br<sub>2</sub>] (**5**) suitable for X-ray diffraction analysis were then obtained by dissolving the solid in CH<sub>2</sub>Cl<sub>2</sub>/hexane mixed solvent and stored in refrigerator for several days. <sup>31</sup>P NMR (162 MHz, CDCl<sub>3</sub>): δ 5.8 (s).

### 3. NMR Spectra for the key complexes 2-4

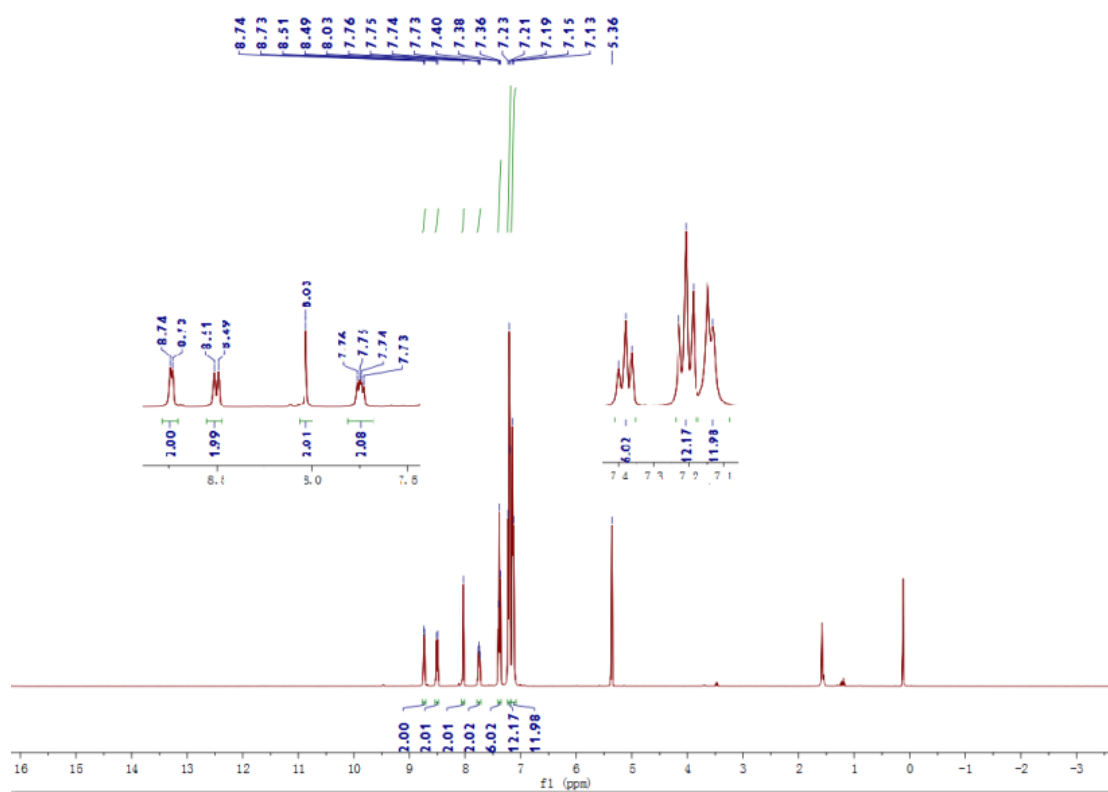

**Figure S1.**  $^1\text{H}$  NMR (400 MHz,  $\text{CD}_2\text{Cl}_2$ ) of complex **2** (The two insets show the fine splitting of phen and  $\text{PPh}_3$  respectively).

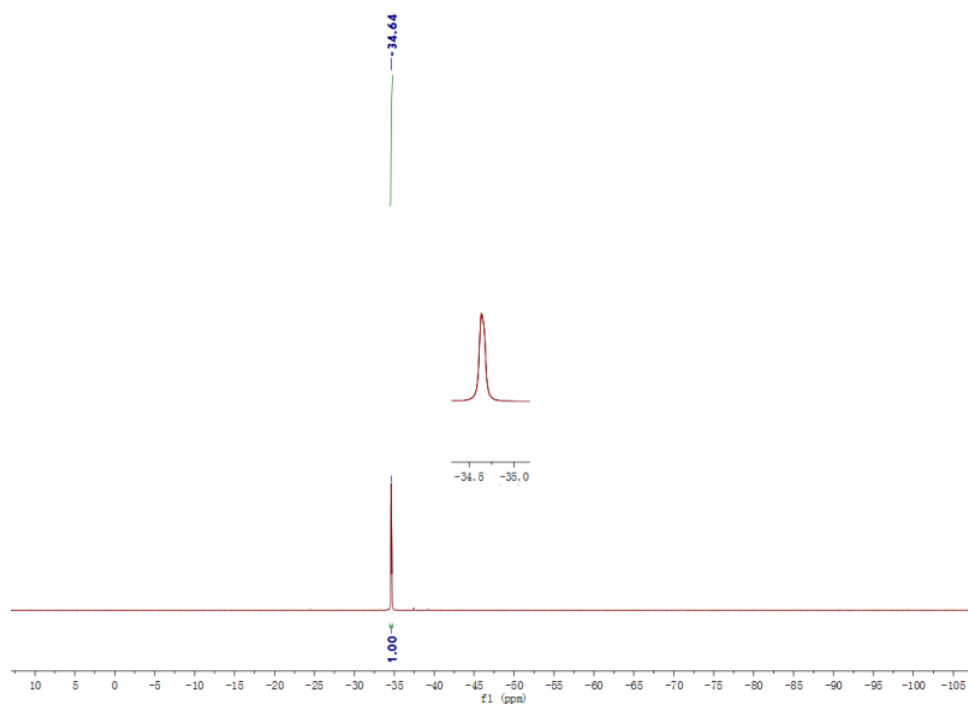

**Figure S2.**  $^{19}\text{F}$  NMR (376 MHz,  $\text{CD}_2\text{Cl}_2$ ) of complex **2**.

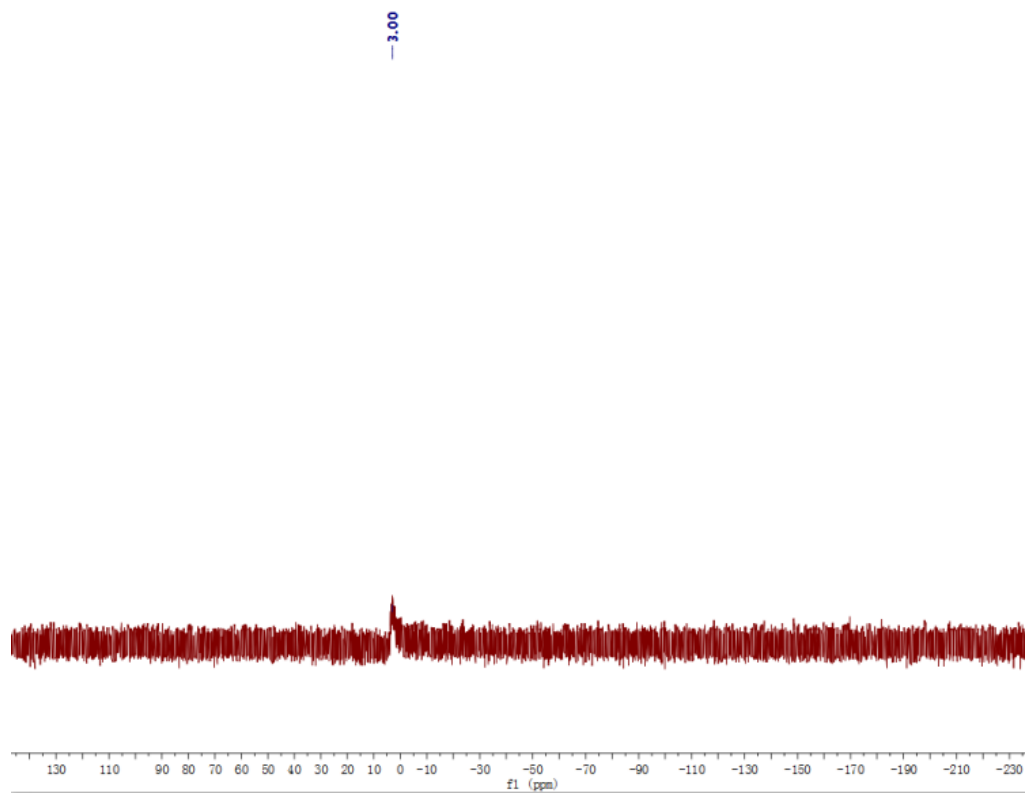

**Figure S3.**  $^{31}\text{P}$  NMR (162 MHz,  $\text{CD}_2\text{Cl}_2$ ) of complex **2**.

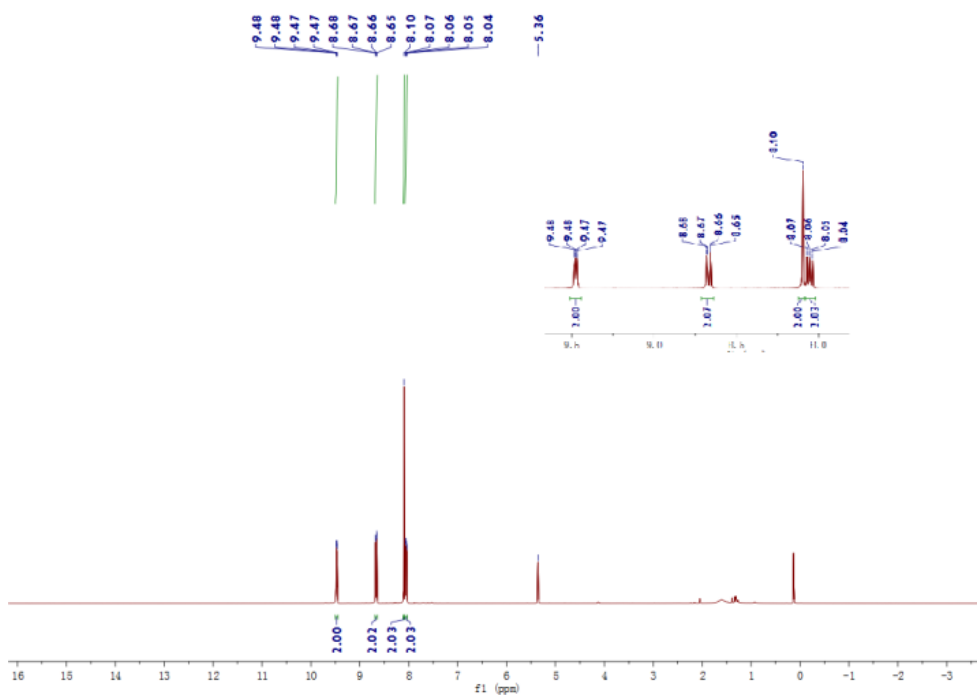

**Figure S4.**  $^1\text{H}$  NMR (400 MHz,  $\text{CD}_2\text{Cl}_2$ ) of complex **3** (the inset shows fine splitting of phen).

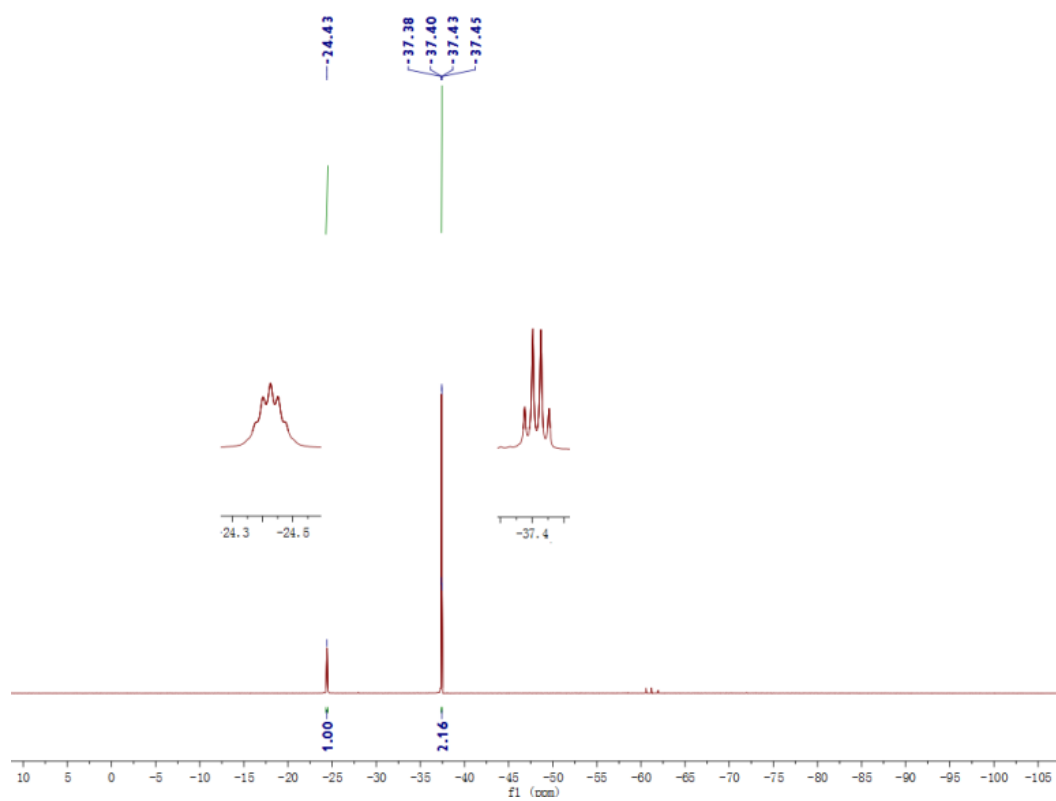

**Figure S5.**  $^{19}\text{F}$  NMR (376 MHz,  $\text{CD}_2\text{Cl}_2$ ) of complex **3** (the two insets show fine splitting of the two signals).



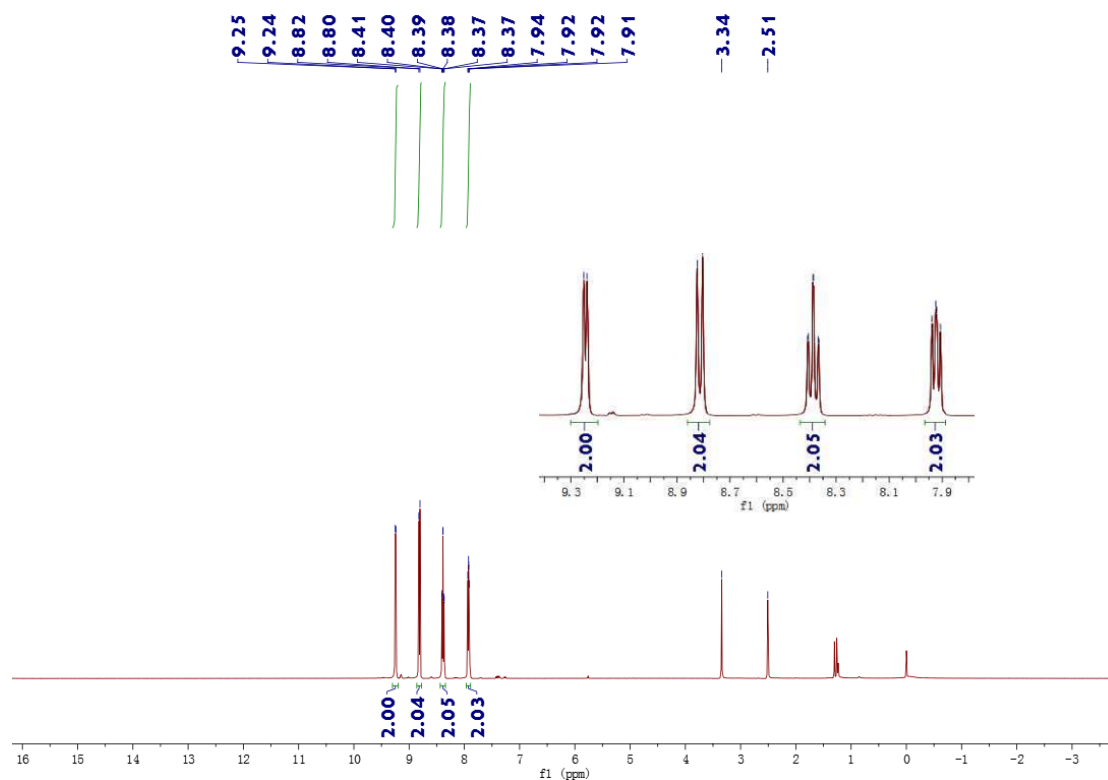

**Figure S6.**  $^1\text{H}$  NMR (400 MHz,  $d^6$ -DMSO) of complex **4** (the inset shows fine splitting of bpy). Signals at 2.51 and 3.34 ppm are resonances of residual DMSO.

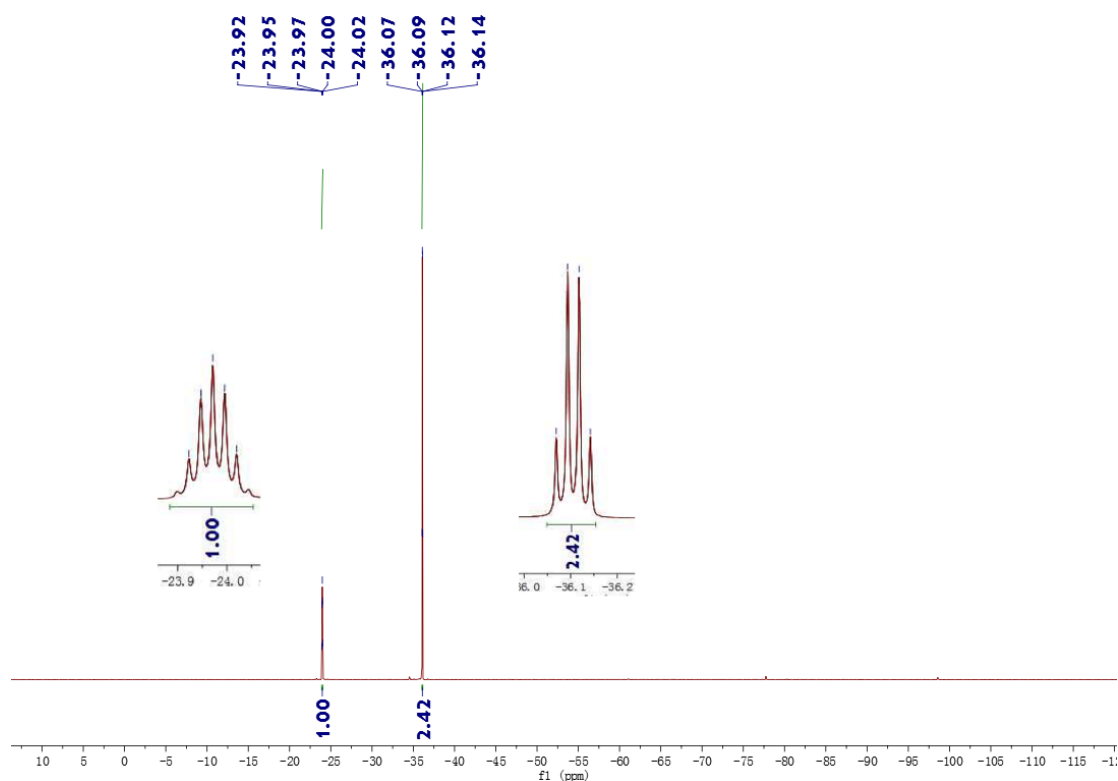

**Figure S7.**  $^{19}\text{F}$  NMR (376 MHz,  $d^6$ -DMSO) of complex **4** (the two insets show fine splitting of the two signals).

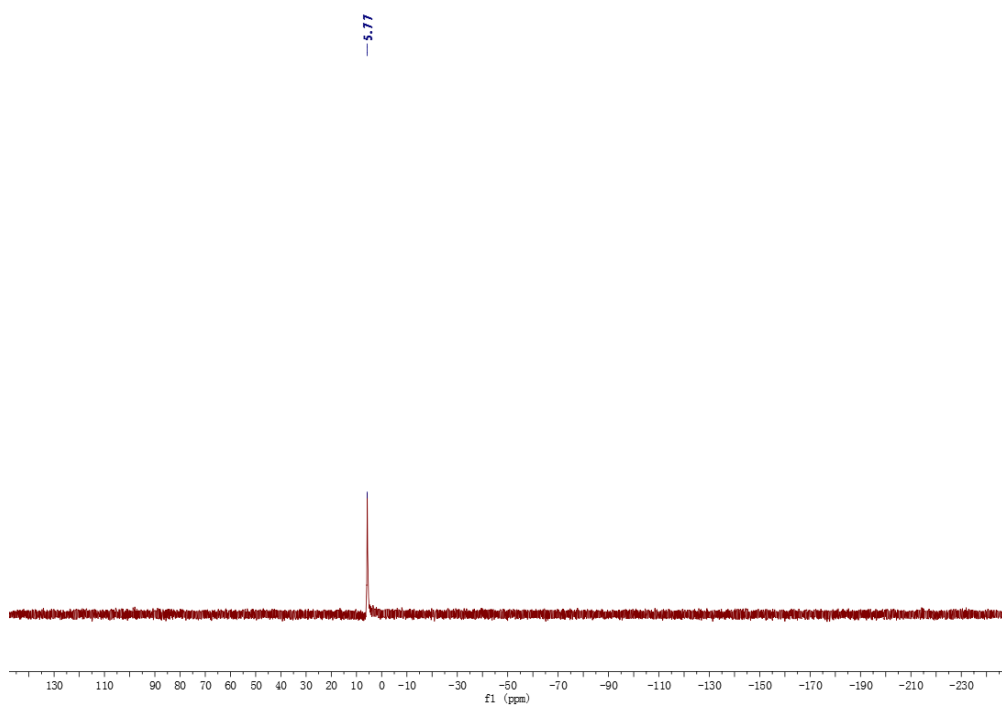

**Figure S8.**  $^{31}\text{P}$  NMR (162 MHz,  $\text{CDCl}_3$ ) of complex **5**.

#### 4. Crystallographic study

Crystals of complexes **2**, **3** and **5** suitable for X-ray crystallographic analyses were grown by dissolving **2**, **3** or **5** in a mixed solvent of CH<sub>2</sub>Cl<sub>2</sub>/hexane and then stored in the refrigerator for 2-3 days. CCDCs 1402421, 1402422 and 1402423 contain the detailed information about the crystallographic study and crystal structures of complexes **3**, **2** and **5**. The following sections show some key information.

##### (1) Complex **3**:

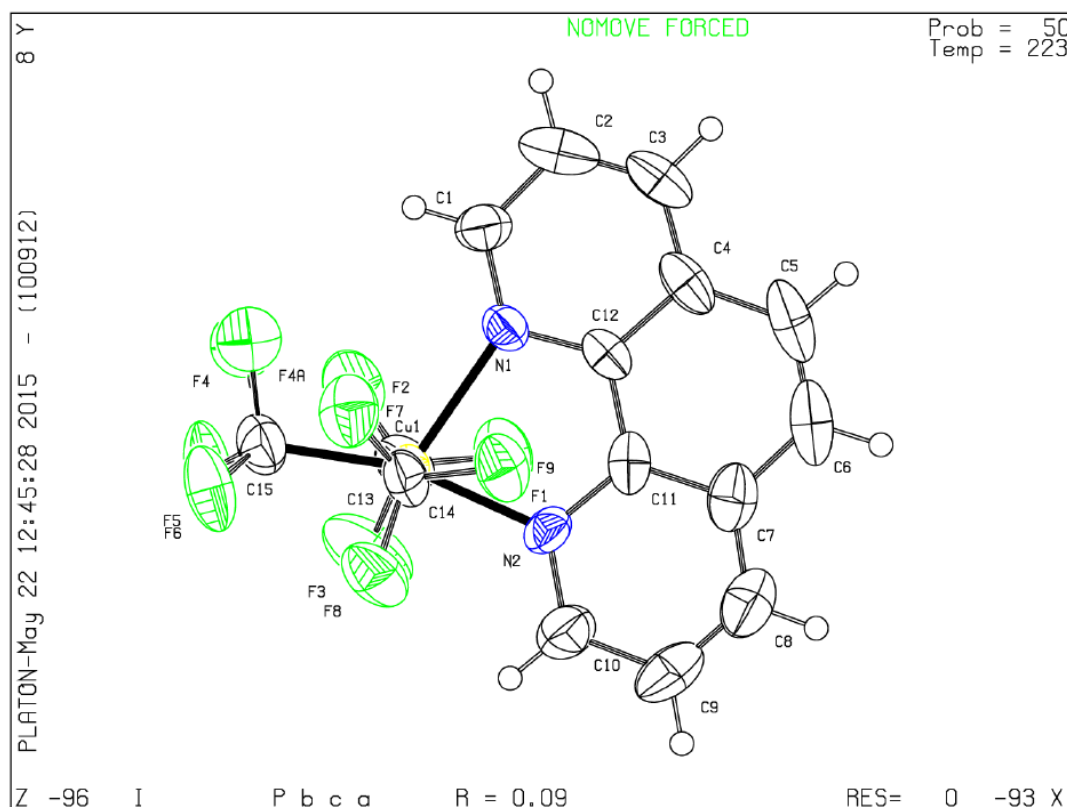

##### Crystal data for complex **3**

|                                |                                                         |
|--------------------------------|---------------------------------------------------------|
| $C_{15}H_8CuF_9N_2$            |                                                         |
| $M_r = 450.77$                 | $D_x = 1.819 \text{ Mg m}^{-3}$                         |
| Orthorhombic, <i>Pbca</i>      | Melting point: ? K                                      |
| Hall symbol: $-P\ 2ac\ 2ab$    | Mo $K\alpha$ radiation, $\lambda = 0.71073 \text{ \AA}$ |
| $a = 11.1138 (9) \text{ \AA}$  | Cell parameters from 1382 reflections                   |
| $b = 16.303 (2) \text{ \AA}$   | $\theta = 3.2\text{--}23.5^\circ$                       |
| $c = 18.1646 (17) \text{ \AA}$ | $\mu = 1.42 \text{ mm}^{-1}$                            |

|                                            |                                                                               |
|--------------------------------------------|-------------------------------------------------------------------------------|
| $V = \underline{3291.3 (6)} \text{ \AA}^3$ | $T = \underline{223} \text{ K}$                                               |
| $Z = \underline{8}$                        | <u>Plate, yellow</u>                                                          |
| $F(000) = \underline{1776}$                | $\underline{0.35} \times \underline{0.30} \times \underline{0.20} \text{ mm}$ |

Fractional atomic coordinates and isotropic or equivalent isotropic displacement parameters ( $\text{\AA}^2$ )

|     | $x$         | $y$         | $z$         | $U_{\text{iso}}^*/U_{\text{eq}}$ | Occ. (<1) |
|-----|-------------|-------------|-------------|----------------------------------|-----------|
| Cu1 | 0.73286 (8) | 0.12077 (5) | 0.33566 (5) | 0.0379 (4)                       |           |
| F1  | 0.7020 (5)  | -0.0256 (3) | 0.4113 (3)  | 0.0676 (15)                      |           |
| F2  | 0.7995 (6)  | -0.0434 (3) | 0.3113 (3)  | 0.0801 (18)                      |           |
| F3  | 0.6091 (6)  | -0.0255 (4) | 0.3074 (4)  | 0.102 (2)                        |           |
| F4  | 0.8932 (11) | 0.0862 (8)  | 0.2300 (6)  | 0.080 (4)*                       | 0.50      |
| F4A | 0.9064 (11) | 0.1255 (8)  | 0.2318 (7)  | 0.073 (4)*                       | 0.50      |
| F5  | 0.7406 (7)  | 0.0456 (4)  | 0.1965 (3)  | 0.097 (2)                        |           |
| F6  | 0.7472 (6)  | 0.1743 (4)  | 0.1895 (3)  | 0.0789 (18)                      |           |
| F7  | 0.8391 (5)  | 0.2704 (3)  | 0.2891 (3)  | 0.0709 (15)                      |           |
| F8  | 0.6447 (5)  | 0.2734 (3)  | 0.2945 (3)  | 0.0724 (15)                      |           |
| F9  | 0.7531 (4)  | 0.2792 (3)  | 0.3928 (3)  | 0.0597 (14)                      |           |
| N1  | 0.8818 (6)  | 0.1163 (4)  | 0.4152 (3)  | 0.0410 (15)                      |           |
| N2  | 0.6432 (5)  | 0.1364 (4)  | 0.4280 (3)  | 0.0425 (16)                      |           |
| C1  | 0.9997 (7)  | 0.1047 (5)  | 0.4082 (5)  | 0.052 (2)                        |           |
| H1  | 1.0315      | 0.0972      | 0.3608      | 0.062*                           |           |
| C2  | 1.0786 (9)  | 0.1032 (5)  | 0.4681 (7)  | 0.068 (3)                        |           |
| H2  | 1.1620      | 0.0979      | 0.4609      | 0.081*                           |           |
| C3  | 1.0325 (9)  | 0.1095 (5)  | 0.5362 (6)  | 0.063 (3)                        |           |
| H3  | 1.0839      | 0.1056      | 0.5771      | 0.076*                           |           |
| C4  | 0.9097 (9)  | 0.1215 (5)  | 0.5472 (5)  | 0.053 (2)                        |           |
| C5  | 0.8528 (13) | 0.1305 (6)  | 0.6176 (5)  | 0.076 (3)                        |           |

|     |             |            |            |             |  |
|-----|-------------|------------|------------|-------------|--|
| H5  | 0.9002      | 0.1294     | 0.6605     | 0.091*      |  |
| C6  | 0.7329 (12) | 0.1404 (6) | 0.6237 (6) | 0.077 (3)   |  |
| H6  | 0.6985      | 0.1449     | 0.6708     | 0.092*      |  |
| C7  | 0.6576 (9)  | 0.1442 (5) | 0.5614 (5) | 0.058 (2)   |  |
| C8  | 0.5343 (10) | 0.1579 (6) | 0.5634 (6) | 0.072 (3)   |  |
| H8  | 0.4971      | 0.1656     | 0.6093     | 0.087*      |  |
| C9  | 0.4651 (8)  | 0.1605 (6) | 0.5019 (6) | 0.071 (3)   |  |
| H9  | 0.3816      | 0.1692     | 0.5047     | 0.085*      |  |
| C10 | 0.5241 (8)  | 0.1495 (6) | 0.4324 (5) | 0.064 (2)   |  |
| H10 | 0.4784      | 0.1515     | 0.3889     | 0.077*      |  |
| C11 | 0.7102 (8)  | 0.1349 (4) | 0.4915 (4) | 0.046 (2)   |  |
| C12 | 0.8381 (7)  | 0.1240 (4) | 0.4846 (4) | 0.0416 (18) |  |
| C13 | 0.7114 (8)  | 0.0015 (5) | 0.3392 (5) | 0.055 (2)   |  |
| C14 | 0.7457 (8)  | 0.2398 (6) | 0.3260 (4) | 0.049 (2)   |  |
| C15 | 0.7781 (9)  | 0.1099 (6) | 0.2331 (5) | 0.061 (3)   |  |

Geometric parameters (Å, °)

|         |            |        |            |
|---------|------------|--------|------------|
| Cu1—C15 | 1.939 (10) | C1—H1  | 0.9400     |
| Cu1—C14 | 1.953 (9)  | C2—C3  | 1.342 (14) |
| Cu1—C13 | 1.960 (9)  | C2—H2  | 0.9400     |
| Cu1—N2  | 1.968 (6)  | C3—C4  | 1.393 (14) |
| Cu1—N1  | 2.198 (6)  | C3—H3  | 0.9400     |
| F1—C13  | 1.386 (9)  | C4—C12 | 1.389 (11) |
| F2—C13  | 1.324 (10) | C4—C5  | 1.435 (15) |
| F3—C13  | 1.349 (10) | C5—C6  | 1.346 (15) |
| F4—C15  | 1.337 (15) | C5—H5  | 0.9400     |
| F4A—C15 | 1.449 (16) | C6—C7  | 1.410 (14) |
| F5—C15  | 1.310 (11) | C6—H6  | 0.9400     |

|             |            |            |            |
|-------------|------------|------------|------------|
| F6—C15      | 1.358 (10) | C7—C8      | 1.389 (14) |
| F7—C14      | 1.333 (9)  | C7—C11     | 1.405 (12) |
| F8—C14      | 1.374 (9)  | C8—C9      | 1.357 (14) |
| F9—C14      | 1.376 (9)  | C8—H8      | 0.9400     |
| N1—C1       | 1.330 (10) | C9—C10     | 1.433 (12) |
| N1—C12      | 1.357 (10) | C9—H9      | 0.9400     |
| N2—C10      | 1.343 (10) | C10—H10    | 0.9400     |
| N2—C11      | 1.373 (10) | C11—C12    | 1.438 (12) |
| C1—C2       | 1.397 (12) |            |            |
| C15—Cu1—C14 | 89.2 (4)   | C9—C8—C7   | 122.9 (9)  |
| C15—Cu1—C13 | 88.4 (4)   | C9—C8—H8   | 118.6      |
| C14—Cu1—C13 | 175.7 (3)  | C7—C8—H8   | 118.6      |
| C15—Cu1—N2  | 164.3 (4)  | C8—C9—C10  | 117.5 (8)  |
| C14—Cu1—N2  | 89.1 (3)   | C8—C9—H9   | 121.2      |
| C13—Cu1—N2  | 92.2 (3)   | C10—C9—H9  | 121.2      |
| C15—Cu1—N1  | 115.7 (4)  | N2—C10—C9  | 121.5 (8)  |
| C14—Cu1—N1  | 92.1 (3)   | N2—C10—H10 | 119.3      |
| C13—Cu1—N1  | 92.1 (3)   | C9—C10—H10 | 119.3      |
| N2—Cu1—N1   | 79.9 (3)   | N2—C11—C7  | 122.1 (8)  |
| C1—N1—C12   | 117.0 (7)  | N2—C11—C12 | 117.7 (6)  |
| C1—N1—Cu1   | 133.2 (6)  | C7—C11—C12 | 120.2 (8)  |
| C12—N1—Cu1  | 109.7 (5)  | N1—C12—C4  | 123.6 (8)  |
| C10—N2—C11  | 119.2 (7)  | N1—C12—C11 | 116.5 (6)  |
| C10—N2—Cu1  | 124.7 (6)  | C4—C12—C11 | 119.9 (8)  |
| C11—N2—Cu1  | 116.1 (5)  | F2—C13—F3  | 106.2 (7)  |
| N1—C1—C2    | 123.2 (9)  | F2—C13—F1  | 104.0 (7)  |
| N1—C1—H1    | 118.4      | F3—C13—F1  | 103.8 (7)  |
| C2—C1—H1    | 118.4      | F2—C13—Cu1 | 116.5 (6)  |

|           |            |             |            |
|-----------|------------|-------------|------------|
| C3—C2—C1  | 118.5 (9)  | F3—C13—Cu1  | 114.3 (6)  |
| C3—C2—H2  | 120.8      | F1—C13—Cu1  | 110.9 (5)  |
| C1—C2—H2  | 120.8      | F7—C14—F8   | 106.1 (7)  |
| C2—C3—C4  | 121.1 (8)  | F7—C14—F9   | 102.8 (7)  |
| C2—C3—H3  | 119.5      | F8—C14—F9   | 103.3 (6)  |
| C4—C3—H3  | 119.5      | F7—C14—Cu1  | 118.3 (6)  |
| C12—C4—C3 | 116.6 (9)  | F8—C14—Cu1  | 112.0 (6)  |
| C12—C4—C5 | 118.3 (9)  | F9—C14—Cu1  | 112.9 (5)  |
| C3—C4—C5  | 125.0 (9)  | F5—C15—F4   | 93.0 (9)   |
| C6—C5—C4  | 121.4 (9)  | F5—C15—F6   | 104.0 (8)  |
| C6—C5—H5  | 119.3      | F4—C15—F6   | 116.2 (10) |
| C4—C5—H5  | 119.3      | F5—C15—F4A  | 116.5 (10) |
| C5—C6—C7  | 121.8 (10) | F4—C15—F4A  | 27.0 (7)   |
| C5—C6—H6  | 119.1      | F6—C15—F4A  | 95.9 (8)   |
| C7—C6—H6  | 119.1      | F5—C15—Cu1  | 118.6 (7)  |
| C8—C7—C11 | 116.8 (9)  | F4—C15—Cu1  | 108.3 (8)  |
| C8—C7—C6  | 124.9 (10) | F6—C15—Cu1  | 115.1 (7)  |
| C11—C7—C6 | 118.3 (10) | F4A—C15—Cu1 | 104.8 (7)  |

## (2) Complex 2

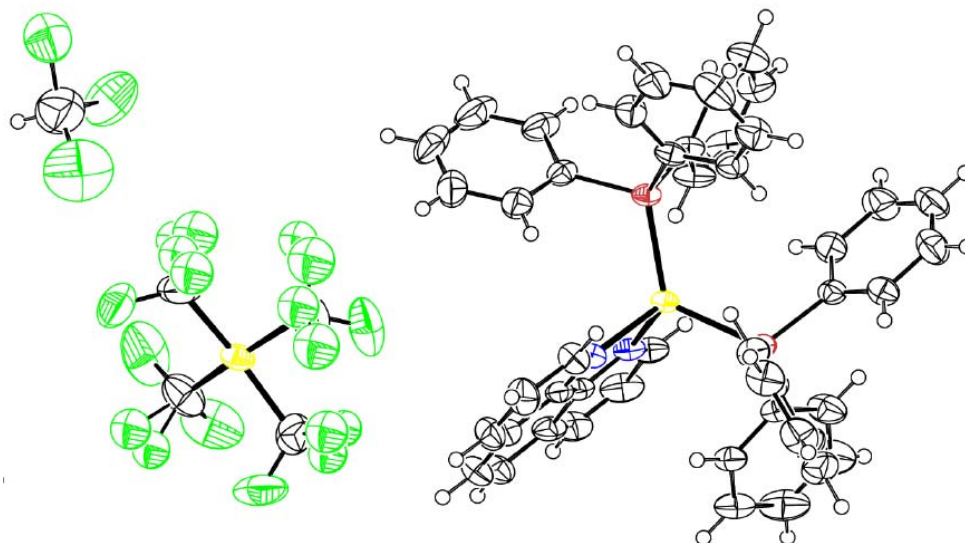

Some disorders of the fluorine atoms were observed in the crystal structure of complex 2.

### Crystal data for complex 2

|                                             |                                                         |
|---------------------------------------------|---------------------------------------------------------|
| $C_{52}H_{38}Cu_2F_{12}N_2P_2 \cdot CHCl_3$ |                                                         |
| $M_r = 1227.23$                             | $D_x = 1.580 \text{ Mg m}^{-3}$                         |
| Monoclinic, $P2_1/n$                        | Melting point: ? K                                      |
| Hall symbol: $-P 2yn$                       | Mo $K\alpha$ radiation, $\lambda = 0.71073 \text{ \AA}$ |
| $a = 14.4553 (12) \text{ \AA}$              | Cell parameters from 9023 reflections                   |
| $b = 19.5245 (15) \text{ \AA}$              | $\theta = 2.5\text{--}29.7^\circ$                       |
| $c = 18.3344 (15) \text{ \AA}$              | $\mu = 1.13 \text{ mm}^{-1}$                            |
| $\beta = 94.601 (2)^\circ$                  | $T = 273 \text{ K}$                                     |
| $V = 5157.9 (7) \text{ \AA}^3$              | Block, yellow                                           |
| $Z = 4$                                     | $0.20 \times 0.15 \times 0.10 \text{ mm}$               |
| $F(000) = 2472$                             |                                                         |

Fractional atomic coordinates and isotropic or equivalent isotropic displacement parameters



(Å<sup>2</sup>)

|     | x           | y           | z           | $U_{\text{iso}}^*/U_{\text{eq}}$ | Occ. (<1) |
|-----|-------------|-------------|-------------|----------------------------------|-----------|
| Cu1 | 0.62946 (4) | 0.56005 (3) | 0.29358 (3) | 0.0274 (2)                       |           |
| Cu2 | 0.88867 (5) | 0.38884 (4) | 0.71689 (4) | 0.0400 (2)                       |           |
| P1  | 0.58315 (9) | 0.53579 (7) | 0.17614 (7) | 0.0289 (3)                       |           |
| P2  | 0.68626 (9) | 0.66245 (7) | 0.33057 (7) | 0.0283 (3)                       |           |
| N1  | 0.7014 (3)  | 0.4784 (2)  | 0.3440 (2)  | 0.0303 (9)                       |           |
| N2  | 0.5250 (3)  | 0.5194 (2)  | 0.3545 (3)  | 0.0319 (9)                       |           |
| C1  | 0.4759 (4)  | 0.4865 (3)  | 0.1728 (3)  | 0.0347 (11)                      |           |
| C2  | 0.4766 (4)  | 0.4262 (3)  | 0.2137 (3)  | 0.0401 (13)                      |           |
| H2  | 0.5319      | 0.4106      | 0.2374      | 0.048*                           |           |
| C3  | 0.3954 (5)  | 0.3893 (3)  | 0.2191 (4)  | 0.0518 (17)                      |           |
| H3  | 0.3961      | 0.3498      | 0.2474      | 0.062*                           |           |
| C4  | 0.3153 (5)  | 0.4110 (4)  | 0.1833 (6)  | 0.069 (2)                        |           |
| H4  | 0.2614      | 0.3854      | 0.1862      | 0.082*                           |           |
| C5  | 0.3123 (5)  | 0.4707 (4)  | 0.1424 (6)  | 0.077 (3)                        |           |
| H5  | 0.2565      | 0.4858      | 0.1191      | 0.093*                           |           |
| C6  | 0.3945 (4)  | 0.5085 (4)  | 0.1364 (5)  | 0.0543 (17)                      |           |
| H6  | 0.3936      | 0.5480      | 0.1080      | 0.065*                           |           |
| C7  | 0.6609 (4)  | 0.4843 (3)  | 0.1255 (3)  | 0.0324 (11)                      |           |
| C8  | 0.6298 (5)  | 0.4320 (3)  | 0.0777 (4)  | 0.0459 (14)                      |           |
| H8  | 0.5671      | 0.4206      | 0.0728      | 0.055*                           |           |
| C9  | 0.6922 (6)  | 0.3970 (4)  | 0.0375 (4)  | 0.0555 (17)                      |           |
| H9  | 0.6709      | 0.3621      | 0.0060      | 0.067*                           |           |
| C10 | 0.7849 (5)  | 0.4133 (4)  | 0.0439 (4)  | 0.0545 (17)                      |           |
| H10 | 0.8260      | 0.3905      | 0.0158      | 0.065*                           |           |
| C11 | 0.8170 (5)  | 0.4646 (4)  | 0.0928 (4)  | 0.0518 (16)                      |           |
| H11 | 0.8800      | 0.4750      | 0.0982      | 0.062*                           |           |

|     |            |            |            |             |  |
|-----|------------|------------|------------|-------------|--|
| C12 | 0.7560 (4) | 0.4998 (3) | 0.1332 (4) | 0.0417 (13) |  |
| H12 | 0.7779     | 0.5338     | 0.1655     | 0.050*      |  |
| C13 | 0.5566 (4) | 0.6092 (3) | 0.1155 (3) | 0.0336 (11) |  |
| C14 | 0.5106 (5) | 0.6642 (3) | 0.1445 (4) | 0.0463 (14) |  |
| H14 | 0.4934     | 0.6619     | 0.1922     | 0.056*      |  |
| C15 | 0.4902 (5) | 0.7225 (4) | 0.1028 (5) | 0.0584 (18) |  |
| H15 | 0.4570     | 0.7582     | 0.1218     | 0.070*      |  |
| C16 | 0.5196 (5) | 0.7273 (4) | 0.0325 (4) | 0.0552 (18) |  |
| H16 | 0.5080     | 0.7668     | 0.0048     | 0.066*      |  |
| C17 | 0.5658 (5) | 0.6730 (4) | 0.0047 (4) | 0.0553 (17) |  |
| H17 | 0.5850     | 0.6757     | -0.0424    | 0.066*      |  |
| C18 | 0.5844 (4) | 0.6143 (3) | 0.0458 (3) | 0.0413 (13) |  |
| H18 | 0.6160     | 0.5781     | 0.0260     | 0.050*      |  |
| C19 | 0.7841 (4) | 0.6950 (3) | 0.2840 (3) | 0.0317 (11) |  |
| C20 | 0.7769 (4) | 0.6944 (3) | 0.2086 (3) | 0.0403 (13) |  |
| H20 | 0.7240     | 0.6765     | 0.1833     | 0.048*      |  |
| C21 | 0.8480 (5) | 0.7205 (4) | 0.1698 (4) | 0.0532 (17) |  |
| H21 | 0.8418     | 0.7204     | 0.1190     | 0.064*      |  |
| C22 | 0.9272 (5) | 0.7464 (4) | 0.2060 (5) | 0.0583 (19) |  |
| H22 | 0.9746     | 0.7637     | 0.1800     | 0.070*      |  |
| C23 | 0.9356 (5) | 0.7465 (4) | 0.2818 (5) | 0.0578 (19) |  |
| H23 | 0.9894     | 0.7631     | 0.3068     | 0.069*      |  |
| C24 | 0.8635 (4) | 0.7216 (3) | 0.3208 (4) | 0.0459 (15) |  |
| H24 | 0.8689     | 0.7229     | 0.3717     | 0.055*      |  |
| C25 | 0.6026 (4) | 0.7328 (3) | 0.3194 (3) | 0.0340 (11) |  |
| C26 | 0.5107 (4) | 0.7189 (3) | 0.3312 (4) | 0.0457 (15) |  |
| H26 | 0.4947     | 0.6756     | 0.3473     | 0.055*      |  |
| C27 | 0.4430 (5) | 0.7679 (4) | 0.3196 (5) | 0.0590 (19) |  |

|     |            |            |            |             |  |
|-----|------------|------------|------------|-------------|--|
| H27 | 0.3817     | 0.7575     | 0.3272     | 0.071*      |  |
| C28 | 0.4655 (5) | 0.8327 (4) | 0.2968 (4) | 0.0542 (17) |  |
| H28 | 0.4199     | 0.8659     | 0.2879     | 0.065*      |  |
| C29 | 0.5572 (5) | 0.8471 (3) | 0.2873 (4) | 0.0557 (17) |  |
| H29 | 0.5734     | 0.8909     | 0.2731     | 0.067*      |  |
| C30 | 0.6247 (4) | 0.7985 (3) | 0.2984 (4) | 0.0437 (14) |  |
| H30 | 0.6860     | 0.8096     | 0.2918     | 0.052*      |  |
| C31 | 0.7286 (4) | 0.6656 (3) | 0.4267 (3) | 0.0347 (12) |  |
| C32 | 0.7911 (4) | 0.6158 (3) | 0.4533 (4) | 0.0452 (14) |  |
| H32 | 0.8101     | 0.5822     | 0.4218     | 0.054*      |  |
| C33 | 0.8254 (6) | 0.6151 (4) | 0.5261 (4) | 0.063 (2)   |  |
| H33 | 0.8683     | 0.5821     | 0.5430     | 0.075*      |  |
| C34 | 0.7955 (7) | 0.6640 (5) | 0.5732 (4) | 0.074 (3)   |  |
| H34 | 0.8161     | 0.6628     | 0.6225     | 0.089*      |  |
| C35 | 0.7355 (7) | 0.7144 (5) | 0.5473 (5) | 0.073 (3)   |  |
| H35 | 0.7170     | 0.7480     | 0.5791     | 0.088*      |  |
| C36 | 0.7020 (5) | 0.7158 (4) | 0.4744 (4) | 0.0513 (16) |  |
| H36 | 0.6616     | 0.7505     | 0.4573     | 0.062*      |  |
| C37 | 0.7891 (4) | 0.4587 (3) | 0.3391 (3) | 0.0402 (13) |  |
| H37 | 0.8255     | 0.4834     | 0.3087     | 0.048*      |  |
| C38 | 0.8285 (5) | 0.4031 (4) | 0.3773 (4) | 0.0516 (16) |  |
| H38 | 0.8899     | 0.3909     | 0.3725     | 0.062*      |  |
| C39 | 0.7751 (5) | 0.3662 (3) | 0.4224 (4) | 0.0490 (15) |  |
| H39 | 0.8004     | 0.3289     | 0.4485     | 0.059*      |  |
| C40 | 0.6837 (5) | 0.3849 (3) | 0.4288 (3) | 0.0397 (13) |  |
| C41 | 0.6233 (6) | 0.3482 (3) | 0.4730 (4) | 0.0530 (17) |  |
| H41 | 0.6459     | 0.3107     | 0.5002     | 0.064*      |  |
| C42 | 0.5342 (5) | 0.3674 (3) | 0.4757 (4) | 0.0518 (16) |  |

|     |             |              |              |             |      |
|-----|-------------|--------------|--------------|-------------|------|
| H42 | 0.4960      | 0.3419       | 0.5039       | 0.062*      |      |
| C43 | 0.4965 (4)  | 0.4256 (3)   | 0.4366 (3)   | 0.0409 (13) |      |
| C44 | 0.4040 (5)  | 0.4466 (4)   | 0.4374 (4)   | 0.0513 (17) |      |
| H44 | 0.3636      | 0.4231       | 0.4654       | 0.062*      |      |
| C45 | 0.3742 (4)  | 0.5011 (3)   | 0.3974 (4)   | 0.0513 (17) |      |
| H45 | 0.3127      | 0.5153       | 0.3974       | 0.062*      |      |
| C46 | 0.4353 (4)  | 0.5363 (3)   | 0.3561 (4)   | 0.0405 (13) |      |
| H46 | 0.4129      | 0.5734       | 0.3282       | 0.049*      |      |
| C47 | 0.5545 (4)  | 0.4639 (3)   | 0.3936 (3)   | 0.0307 (11) |      |
| C48 | 0.6491 (4)  | 0.4425 (2)   | 0.3889 (3)   | 0.0300 (11) |      |
| C49 | 0.8224 (6)  | 0.3259 (5)   | 0.6459 (5)   | 0.071 (2)   |      |
| C50 | 0.9308 (7)  | 0.4407 (6)   | 0.6340 (7)   | 0.091 (3)   |      |
| C51 | 0.9683 (7)  | 0.4402 (4)   | 0.7835 (7)   | 0.086 (3)   |      |
| C52 | 0.8212 (7)  | 0.3498 (5)   | 0.7918 (5)   | 0.074 (2)   |      |
| C53 | 0.9105 (11) | 0.6208 (7)   | 0.9993 (9)   | 0.119 (5)   |      |
| H53 | 0.9046      | 0.6033       | 1.0488       | 0.143*      |      |
| Cl1 | 0.9982 (2)  | 0.68306 (18) | 1.00929 (18) | 0.0999 (9)  |      |
| Cl2 | 0.8040 (2)  | 0.6587 (2)   | 0.9735 (2)   | 0.1203 (12) |      |
| Cl3 | 0.9323 (4)  | 0.5563 (3)   | 0.9528 (4)   | 0.173 (2)   |      |
| F1  | 0.8095 (4)  | 0.2626 (2)   | 0.6736 (4)   | 0.101 (2)   |      |
| F4  | 0.8653 (5)  | 0.4465 (4)   | 0.5773 (3)   | 0.109 (2)   |      |
| F9  | 0.9953 (6)  | 0.4077 (3)   | 0.8474 (4)   | 0.115 (3)   |      |
| F10 | 0.8158 (7)  | 0.3893 (4)   | 0.8525 (4)   | 0.132 (3)   |      |
| F12 | 0.7316 (4)  | 0.3379 (4)   | 0.7754 (5)   | 0.113 (2)   |      |
| F2  | 0.7479 (7)  | 0.3521 (5)   | 0.6101 (6)   | 0.059 (2)*  | 0.50 |
| F3  | 0.8896 (9)  | 0.3232 (6)   | 0.5865 (6)   | 0.079 (3)*  | 0.50 |
| F5  | 0.9440 (7)  | 0.5154 (5)   | 0.6616 (6)   | 0.066 (2)*  | 0.50 |
| F6  | 1.0157 (8)  | 0.4328 (6)   | 0.6201 (6)   | 0.076 (3)*  | 0.50 |

|      |             |            |            |            |      |
|------|-------------|------------|------------|------------|------|
| F7   | 0.9229 (7)  | 0.4985 (5) | 0.8164 (6) | 0.069 (2)* | 0.50 |
| F8   | 1.0450 (8)  | 0.4633 (6) | 0.7713 (6) | 0.072 (3)* | 0.50 |
| F11  | 0.8449 (7)  | 0.2824 (5) | 0.8077 (6) | 0.064 (2)* | 0.50 |
| F2A  | 0.7275 (7)  | 0.3435 (5) | 0.6368 (6) | 0.064 (2)* | 0.50 |
| F3A  | 0.8545 (8)  | 0.3053 (6) | 0.5896 (6) | 0.067 (3)* | 0.50 |
| F5A  | 0.9653 (10) | 0.4925 (8) | 0.6330 (8) | 0.098 (4)* | 0.50 |
| F6A  | 0.9945 (9)  | 0.3966 (7) | 0.5930 (7) | 0.095 (3)* | 0.50 |
| F7A  | 0.9554 (9)  | 0.5035 (7) | 0.7850 (8) | 0.092 (3)* | 0.50 |
| F8A  | 1.0651 (9)  | 0.4438 (6) | 0.7440 (7) | 0.080 (3)* | 0.50 |
| F11A | 0.8713 (8)  | 0.2969 (6) | 0.8308 (7) | 0.073 (3)* | 0.50 |

Geometric parameters (Å, °)

|         |             |         |            |
|---------|-------------|---------|------------|
| Cu1—N1  | 2.079 (4)   | C26—C27 | 1.374 (10) |
| Cu1—N2  | 2.104 (4)   | C26—H26 | 0.9300     |
| Cu1—P2  | 2.2455 (14) | C27—C28 | 1.379 (11) |
| Cu1—P1  | 2.2534 (15) | C27—H27 | 0.9300     |
| Cu2—C51 | 1.896 (9)   | C28—C29 | 1.379 (10) |
| Cu2—C52 | 1.905 (8)   | C28—H28 | 0.9300     |
| Cu2—C50 | 1.962 (10)  | C29—C30 | 1.364 (9)  |
| Cu2—C49 | 1.980 (9)   | C29—H29 | 0.9300     |
| P1—C7   | 1.817 (6)   | C30—H30 | 0.9300     |
| P1—C1   | 1.822 (5)   | C31—C36 | 1.389 (8)  |
| P1—C13  | 1.835 (6)   | C31—C32 | 1.389 (9)  |
| P2—C31  | 1.819 (6)   | C32—C33 | 1.385 (10) |
| P2—C19  | 1.825 (5)   | C32—H32 | 0.9300     |
| P2—C25  | 1.831 (6)   | C33—C34 | 1.380 (14) |
| N1—C37  | 1.335 (7)   | C33—H33 | 0.9300     |

|         |            |         |            |
|---------|------------|---------|------------|
| N1—C48  | 1.358 (7)  | C34—C35 | 1.371 (14) |
| N2—C46  | 1.340 (7)  | C34—H34 | 0.9300     |
| N2—C47  | 1.350 (7)  | C35—C36 | 1.385 (12) |
| C1—C6   | 1.374 (9)  | C35—H35 | 0.9300     |
| C1—C2   | 1.396 (8)  | C36—H36 | 0.9300     |
| C2—C3   | 1.387 (9)  | C37—C38 | 1.390 (9)  |
| C2—H2   | 0.9300     | C37—H37 | 0.9300     |
| C3—C4   | 1.353 (11) | C38—C39 | 1.379 (10) |
| C3—H3   | 0.9300     | C38—H38 | 0.9300     |
| C4—C5   | 1.385 (13) | C39—C40 | 1.385 (10) |
| C4—H4   | 0.9300     | C39—H39 | 0.9300     |
| C5—C6   | 1.411 (10) | C40—C48 | 1.410 (8)  |
| C5—H5   | 0.9300     | C40—C41 | 1.431 (9)  |
| C6—H6   | 0.9300     | C41—C42 | 1.346 (11) |
| C7—C8   | 1.396 (8)  | C41—H41 | 0.9300     |
| C7—C12  | 1.403 (8)  | C42—C43 | 1.428 (10) |
| C8—C9   | 1.389 (10) | C42—H42 | 0.9300     |
| C8—H8   | 0.9300     | C43—C44 | 1.400 (10) |
| C9—C10  | 1.374 (11) | C43—C47 | 1.411 (8)  |
| C9—H9   | 0.9300     | C44—C45 | 1.343 (11) |
| C10—C11 | 1.399 (11) | C44—H44 | 0.9300     |
| C10—H10 | 0.9300     | C45—C46 | 1.391 (9)  |
| C11—C12 | 1.379 (9)  | C45—H45 | 0.9300     |
| C11—H11 | 0.9300     | C46—H46 | 0.9300     |
| C12—H12 | 0.9300     | C47—C48 | 1.438 (8)  |
| C13—C18 | 1.375 (9)  | C49—F3A | 1.234 (14) |
| C13—C14 | 1.390 (8)  | C49—F2  | 1.318 (12) |
| C14—C15 | 1.390 (10) | C49—F1  | 1.356 (11) |

|             |             |             |            |
|-------------|-------------|-------------|------------|
| C14—H14     | 0.9300      | C49—F2A     | 1.410 (13) |
| C15—C16     | 1.392 (12)  | C49—F3      | 1.518 (16) |
| C15—H15     | 0.9300      | C50—F5A     | 1.129 (16) |
| C16—C17     | 1.373 (11)  | C50—F6      | 1.284 (14) |
| C16—H16     | 0.9300      | C50—F4      | 1.354 (13) |
| C17—C18     | 1.386 (9)   | C50—F6A     | 1.505 (18) |
| C17—H17     | 0.9300      | C50—F5      | 1.550 (17) |
| C18—H18     | 0.9300      | C51—F8      | 1.234 (15) |
| C19—C20     | 1.379 (8)   | C51—F7A     | 1.250 (15) |
| C19—C24     | 1.385 (8)   | C51—F9      | 1.362 (12) |
| C20—C21     | 1.392 (9)   | C51—F7      | 1.467 (15) |
| C20—H20     | 0.9300      | C51—F8A     | 1.627 (18) |
| C21—C22     | 1.372 (11)  | C52—F12     | 1.326 (12) |
| C21—H21     | 0.9300      | C52—F10     | 1.362 (12) |
| C22—C23     | 1.384 (12)  | C52—F11     | 1.386 (13) |
| C22—H22     | 0.9300      | C52—F11A    | 1.422 (14) |
| C23—C24     | 1.397 (9)   | C53—Cl3     | 1.567 (15) |
| C23—H23     | 0.9300      | C53—Cl2     | 1.739 (14) |
| C24—H24     | 0.9300      | C53—Cl1     | 1.755 (15) |
| C25—C30     | 1.384 (8)   | C53—H53     | 0.9800     |
| C25—C26     | 1.390 (8)   |             |            |
| N1—Cu1—N2   | 80.22 (18)  | C29—C30—H30 | 119.7      |
| N1—Cu1—P2   | 112.98 (13) | C25—C30—H30 | 119.7      |
| N2—Cu1—P2   | 115.85 (12) | C36—C31—C32 | 118.6 (6)  |
| N1—Cu1—P1   | 111.31 (13) | C36—C31—P2  | 123.0 (5)  |
| N2—Cu1—P1   | 104.88 (13) | C32—C31—P2  | 118.4 (4)  |
| P2—Cu1—P1   | 123.31 (6)  | C33—C32—C31 | 121.2 (7)  |
| C51—Cu2—C52 | 93.8 (5)    | C33—C32—H32 | 119.4      |

|             |             |             |           |
|-------------|-------------|-------------|-----------|
| C51—Cu2—C50 | 90.9 (5)    | C31—C32—H32 | 119.4     |
| C52—Cu2—C50 | 166.5 (4)   | C34—C33—C32 | 119.3 (8) |
| C51—Cu2—C49 | 171.1 (4)   | C34—C33—H33 | 120.3     |
| C52—Cu2—C49 | 88.7 (4)    | C32—C33—H33 | 120.3     |
| C50—Cu2—C49 | 88.6 (5)    | C35—C34—C33 | 120.1 (7) |
| C7—P1—C1    | 104.5 (3)   | C35—C34—H34 | 119.9     |
| C7—P1—C13   | 103.3 (3)   | C33—C34—H34 | 119.9     |
| C1—P1—C13   | 104.8 (3)   | C34—C35—C36 | 120.7 (8) |
| C7—P1—Cu1   | 117.14 (18) | C34—C35—H35 | 119.6     |
| C1—P1—Cu1   | 109.27 (19) | C36—C35—H35 | 119.6     |
| C13—P1—Cu1  | 116.51 (18) | C35—C36—C31 | 120.0 (8) |
| C31—P2—C19  | 103.2 (2)   | C35—C36—H36 | 120.0     |
| C31—P2—C25  | 104.5 (3)   | C31—C36—H36 | 120.0     |
| C19—P2—C25  | 102.5 (2)   | N1—C37—C38  | 123.0 (6) |
| C31—P2—Cu1  | 114.15 (18) | N1—C37—H37  | 118.5     |
| C19—P2—Cu1  | 116.57 (18) | C38—C37—H37 | 118.5     |
| C25—P2—Cu1  | 114.32 (18) | C39—C38—C37 | 119.0 (6) |
| C37—N1—C48  | 118.1 (5)   | C39—C38—H38 | 120.5     |
| C37—N1—Cu1  | 129.4 (4)   | C37—C38—H38 | 120.5     |
| C48—N1—Cu1  | 112.5 (3)   | C38—C39—C40 | 119.8 (6) |
| C46—N2—C47  | 116.8 (5)   | C38—C39—H39 | 120.1     |
| C46—N2—Cu1  | 131.0 (4)   | C40—C39—H39 | 120.1     |
| C47—N2—Cu1  | 112.0 (3)   | C39—C40—C48 | 117.9 (6) |
| C6—C1—C2    | 119.6 (5)   | C39—C40—C41 | 123.0 (6) |
| C6—C1—P1    | 123.0 (5)   | C48—C40—C41 | 119.1 (6) |
| C2—C1—P1    | 117.2 (4)   | C42—C41—C40 | 120.6 (6) |
| C3—C2—C1    | 120.4 (6)   | C42—C41—H41 | 119.7     |
| C3—C2—H2    | 119.8       | C40—C41—H41 | 119.7     |



|             |           |             |           |
|-------------|-----------|-------------|-----------|
| C1—C2—H2    | 119.8     | C41—C42—C43 | 122.1 (6) |
| C4—C3—C2    | 120.0 (7) | C41—C42—H42 | 119.0     |
| C4—C3—H3    | 120.0     | C43—C42—H42 | 119.0     |
| C2—C3—H3    | 120.0     | C44—C43—C47 | 117.4 (6) |
| C3—C4—C5    | 120.9 (6) | C44—C43—C42 | 123.7 (6) |
| C3—C4—H4    | 119.5     | C47—C43—C42 | 118.9 (6) |
| C5—C4—H4    | 119.5     | C45—C44—C43 | 119.5 (6) |
| C4—C5—C6    | 119.5 (7) | C45—C44—H44 | 120.3     |
| C4—C5—H5    | 120.2     | C43—C44—H44 | 120.3     |
| C6—C5—H5    | 120.2     | C44—C45—C46 | 119.9 (6) |
| C1—C6—C5    | 119.5 (7) | C44—C45—H45 | 120.1     |
| C1—C6—H6    | 120.3     | C46—C45—H45 | 120.1     |
| C5—C6—H6    | 120.3     | N2—C46—C45  | 123.3 (6) |
| C8—C7—C12   | 118.9 (5) | N2—C46—H46  | 118.3     |
| C8—C7—P1    | 122.9 (4) | C45—C46—H46 | 118.3     |
| C12—C7—P1   | 118.1 (4) | N2—C47—C43  | 123.1 (5) |
| C9—C8—C7    | 120.2 (6) | N2—C47—C48  | 117.6 (5) |
| C9—C8—H8    | 119.9     | C43—C47—C48 | 119.2 (5) |
| C7—C8—H8    | 119.9     | N1—C48—C40  | 122.3 (5) |
| C10—C9—C8   | 120.8 (6) | N1—C48—C47  | 117.6 (5) |
| C10—C9—H9   | 119.6     | C40—C48—C47 | 120.0 (5) |
| C8—C9—H9    | 119.6     | F3A—C49—F2  | 93.2 (9)  |
| C9—C10—C11  | 119.4 (6) | F3A—C49—F1  | 95.0 (9)  |
| C9—C10—H10  | 120.3     | F2—C49—F1   | 114.1 (9) |
| C11—C10—H10 | 120.3     | F3A—C49—F2A | 114.1 (9) |
| C12—C11—C10 | 120.5 (6) | F2—C49—F2A  | 25.8 (5)  |
| C12—C11—H11 | 119.8     | F1—C49—F2A  | 96.0 (8)  |
| C10—C11—H11 | 119.8     | F3A—C49—F3  | 23.3 (7)  |

|             |           |             |            |
|-------------|-----------|-------------|------------|
| C11—C12—C7  | 120.2 (6) | F2—C49—F3   | 101.5 (9)  |
| C11—C12—H12 | 119.9     | F1—C49—F3   | 110.6 (8)  |
| C7—C12—H12  | 119.9     | F2A—C49—F3  | 126.5 (9)  |
| C18—C13—C14 | 118.9 (5) | F3A—C49—Cu2 | 123.9 (9)  |
| C18—C13—P1  | 123.9 (4) | F2—C49—Cu2  | 114.8 (7)  |
| C14—C13—P1  | 117.1 (5) | F1—C49—Cu2  | 113.2 (6)  |
| C15—C14—C13 | 120.6 (6) | F2A—C49—Cu2 | 110.0 (7)  |
| C15—C14—H14 | 119.7     | F3—C49—Cu2  | 100.9 (7)  |
| C13—C14—H14 | 119.7     | F5A—C50—F6  | 70.9 (10)  |
| C14—C15—C16 | 119.9 (7) | F5A—C50—F4  | 101.2 (11) |
| C14—C15—H15 | 120.1     | F6—C50—F4   | 118.5 (11) |
| C16—C15—H15 | 120.1     | F5A—C50—F6A | 102.4 (12) |
| C17—C16—C15 | 119.0 (6) | F6—C50—F6A  | 36.7 (7)   |
| C17—C16—H16 | 120.5     | F4—C50—F6A  | 94.7 (10)  |
| C15—C16—H16 | 120.5     | F5A—C50—F5  | 28.2 (9)   |
| C16—C17—C18 | 121.1 (7) | F6—C50—F5   | 94.7 (9)   |
| C16—C17—H17 | 119.5     | F4—C50—F5   | 103.4 (8)  |
| C18—C17—H17 | 119.5     | F6A—C50—F5  | 129.5 (9)  |
| C13—C18—C17 | 120.5 (6) | F5A—C50—Cu2 | 129.8 (13) |
| C13—C18—H18 | 119.8     | F6—C50—Cu2  | 117.0 (8)  |
| C17—C18—H18 | 119.8     | F4—C50—Cu2  | 113.4 (7)  |
| C20—C19—C24 | 119.0 (5) | F6A—C50—Cu2 | 109.4 (8)  |
| C20—C19—P2  | 117.8 (4) | F5—C50—Cu2  | 105.7 (8)  |
| C24—C19—P2  | 123.1 (4) | F8—C51—F7A  | 77.3 (10)  |
| C19—C20—C21 | 120.6 (6) | F8—C51—F9   | 97.3 (9)   |
| C19—C20—H20 | 119.7     | F7A—C51—F9  | 118.3 (11) |
| C21—C20—H20 | 119.7     | F8—C51—F7   | 103.3 (9)  |
| C22—C21—C20 | 120.6 (7) | F7A—C51—F7  | 32.0 (7)   |

|             |           |              |            |
|-------------|-----------|--------------|------------|
| C22—C21—H21 | 119.7     | F9—C51—F7    | 96.5 (10)  |
| C20—C21—H21 | 119.7     | F8—C51—F8A   | 24.0 (7)   |
| C21—C22—C23 | 119.2 (6) | F7A—C51—F8A  | 95.9 (11)  |
| C21—C22—H22 | 120.4     | F9—C51—F8A   | 101.8 (8)  |
| C23—C22—H22 | 120.4     | F7—C51—F8A   | 125.3 (9)  |
| C22—C23—C24 | 120.3 (6) | F8—C51—Cu2   | 125.7 (11) |
| C22—C23—H23 | 119.9     | F7A—C51—Cu2  | 117.0 (9)  |
| C24—C23—H23 | 119.9     | F9—C51—Cu2   | 115.1 (6)  |
| C19—C24—C23 | 120.3 (6) | F7—C51—Cu2   | 114.0 (7)  |
| C19—C24—H24 | 119.9     | F8A—C51—Cu2  | 103.6 (8)  |
| C23—C24—H24 | 119.9     | F12—C52—F10  | 99.5 (8)   |
| C30—C25—C26 | 118.0 (5) | F12—C52—F11  | 95.8 (8)   |
| C30—C25—P2  | 124.2 (4) | F10—C52—F11  | 113.3 (8)  |
| C26—C25—P2  | 117.8 (4) | F12—C52—F11A | 115.8 (9)  |
| C27—C26—C25 | 121.1 (6) | F10—C52—F11A | 93.4 (8)   |
| C27—C26—H26 | 119.4     | F11—C52—F11A | 25.4 (6)   |
| C25—C26—H26 | 119.4     | F12—C52—Cu2  | 117.0 (7)  |
| C26—C27—C28 | 120.2 (6) | F10—C52—Cu2  | 115.4 (7)  |
| C26—C27—H27 | 119.9     | F11—C52—Cu2  | 113.5 (7)  |
| C28—C27—H27 | 119.9     | F11A—C52—Cu2 | 112.6 (7)  |
| C27—C28—C29 | 118.6 (6) | Cl3—C53—Cl2  | 114.0 (9)  |
| C27—C28—H28 | 120.7     | Cl3—C53—Cl1  | 116.0 (11) |
| C29—C28—H28 | 120.7     | Cl2—C53—Cl1  | 110.5 (7)  |
| C30—C29—C28 | 121.5 (6) | Cl3—C53—H53  | 105.1      |
| C30—C29—H29 | 119.3     | Cl2—C53—H53  | 105.1      |
| C28—C29—H29 | 119.3     | Cl1—C53—H53  | 105.1      |
| C29—C30—C25 | 120.5 (6) |              |            |

(3) Complex 5:  $[(PPh_3)_3Ag_2Br_2] \cdot CH_2Cl_2$ 

Temp = 153

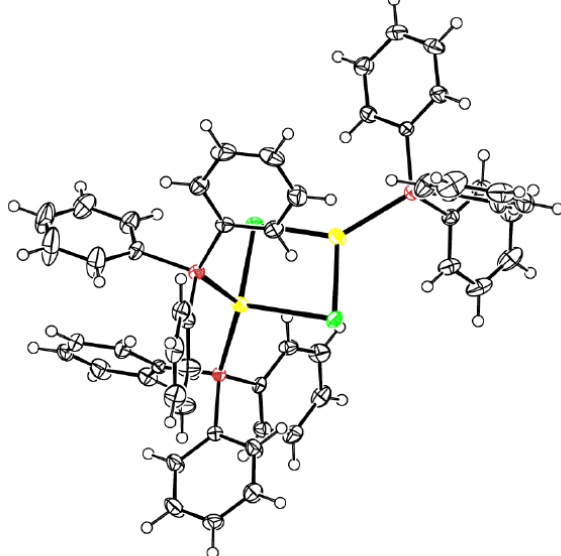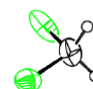*Crystal data*

|                                        |                                                                                      |
|----------------------------------------|--------------------------------------------------------------------------------------|
| $C_{55}H_{47}Ag_2Br_2Cl_2P_3$          | <u>complex 4 with a <math>CH_2Cl_2</math> solvent molecule</u>                       |
| $M_r = 1247.30$                        | $D_x = 1.604 \text{ Mg m}^{-3}$                                                      |
| <u>Monoclinic, <math>P2_1/c</math></u> | Melting point: ? K                                                                   |
| Hall symbol: <u>-P 2ybc</u>            | <u>Mo <math>K\alpha</math> radiation, <math>\lambda = 0.71073 \text{ \AA}</math></u> |
| $a = 16.3137 (7) \text{ \AA}$          | Cell parameters from <u>9685</u> reflections                                         |
| $b = 18.3199 (9) \text{ \AA}$          | $\theta = 2.5\text{--}28.2^\circ$                                                    |
| $c = 18.5850 (9) \text{ \AA}$          | $\mu = 2.54 \text{ mm}^{-1}$                                                         |
| $\beta = 111.592 (1)^\circ$            | $T = 153 \text{ K}$                                                                  |
| $V = 5164.6 (4) \text{ \AA}^3$         | <u>Block, colourless</u>                                                             |
| $Z = 4$                                | <u>0.44 × 0.40 × 0.30 mm</u>                                                         |
| $F(000) = 2480$                        |                                                                                      |

Fractional atomic coordinates and isotropic or equivalent isotropic displacement parameters ( $\text{\AA}^2$ )

|  | x | y | z | $U_{iso}^*/U_{eq}$ |
|--|---|---|---|--------------------|
|--|---|---|---|--------------------|

|     |               |               |               |              |
|-----|---------------|---------------|---------------|--------------|
| Ag1 | 0.672935 (10) | 0.925727 (9)  | 0.805631 (9)  | 0.01888 (4)  |
| Ag2 | 0.839837 (11) | 0.912236 (10) | 0.744962 (10) | 0.02504 (5)  |
| Br1 | 0.755855 (15) | 0.802587 (12) | 0.779016 (13) | 0.02246 (5)  |
| Br2 | 0.753992 (14) | 1.031434 (12) | 0.744515 (14) | 0.02270 (5)  |
| Cl1 | 0.77902 (5)   | 0.01349 (4)   | 0.54962 (5)   | 0.04968 (19) |
| Cl2 | 0.80528 (5)   | 0.11328 (6)   | 0.43857 (6)   | 0.0698 (3)   |
| P1  | 0.51851 (3)   | 0.91432 (3)   | 0.71880 (3)   | 0.01450 (11) |
| P2  | 0.73216 (4)   | 0.94584 (3)   | 0.94520 (3)   | 0.01727 (11) |
| P3  | 0.96462 (4)   | 0.88804 (3)   | 0.71008 (3)   | 0.01871 (12) |
| C1  | 0.50120 (14)  | 0.90296 (11)  | 0.61694 (12)  | 0.0164 (4)   |
| C2  | 0.56932 (15)  | 0.92298 (12)  | 0.59311 (13)  | 0.0226 (5)   |
| H2  | 0.6229        | 0.9412        | 0.6298        | 0.027*       |
| C3  | 0.55944 (17)  | 0.91648 (14)  | 0.51613 (14)  | 0.0308 (6)   |
| H3  | 0.6068        | 0.9294        | 0.5005        | 0.037*       |
| C4  | 0.48124 (17)  | 0.89140 (13)  | 0.46199 (14)  | 0.0295 (6)   |
| H4  | 0.4742        | 0.8883        | 0.4090        | 0.035*       |
| C5  | 0.41368 (16)  | 0.87097 (13)  | 0.48515 (14)  | 0.0283 (5)   |
| H5  | 0.3600        | 0.8532        | 0.4481        | 0.034*       |
| C6  | 0.42332 (15)  | 0.87607 (13)  | 0.56222 (13)  | 0.0244 (5)   |
| H6  | 0.3766        | 0.8612        | 0.5778        | 0.029*       |
| C7  | 0.45797 (14)  | 0.99637 (11)  | 0.72449 (13)  | 0.0178 (4)   |
| C8  | 0.39856 (15)  | 1.03133 (13)  | 0.66069 (15)  | 0.0264 (5)   |
| H8  | 0.3869        | 1.0124        | 0.6103        | 0.032*       |
| C9  | 0.35584 (17)  | 1.09422 (14)  | 0.67028 (17)  | 0.0343 (6)   |
| H9  | 0.3159        | 1.1186        | 0.6262        | 0.041*       |
| C10 | 0.37108 (16)  | 1.12135 (13)  | 0.74324 (18)  | 0.0340 (6)   |
| H10 | 0.3412        | 1.1640        | 0.7493        | 0.041*       |
| C11 | 0.42969 (17)  | 1.08669 (13)  | 0.80747 (17)  | 0.0333 (6)   |

|     |              |              |              |            |
|-----|--------------|--------------|--------------|------------|
| H11 | 0.4399       | 1.1051       | 0.8578       | 0.040*     |
| C12 | 0.47345 (16) | 1.02500 (13) | 0.79802 (14) | 0.0265 (5) |
| H12 | 0.5147       | 1.0017       | 0.8422       | 0.032*     |
| C13 | 0.45269 (13) | 0.84103 (11) | 0.73743 (12) | 0.0164 (4) |
| C14 | 0.48590 (16) | 0.77034 (13) | 0.74539 (15) | 0.0291 (5) |
| H14 | 0.5414       | 0.7615       | 0.7413       | 0.035*     |
| C15 | 0.43905 (17) | 0.71285 (13) | 0.75923 (16) | 0.0334 (6) |
| H15 | 0.4621       | 0.6647       | 0.7635       | 0.040*     |
| C16 | 0.35952 (16) | 0.72453 (13) | 0.76683 (15) | 0.0295 (5) |
| H16 | 0.3276       | 0.6849       | 0.7767       | 0.035*     |
| C17 | 0.32666 (17) | 0.79435 (14) | 0.75998 (19) | 0.0403 (7) |
| H17 | 0.2719       | 0.8030       | 0.7655       | 0.048*     |
| C18 | 0.37268 (16) | 0.85230 (13) | 0.74506 (16) | 0.0318 (6) |
| H18 | 0.3489       | 0.9002       | 0.7401       | 0.038*     |
| C19 | 0.68865 (14) | 0.87720 (12) | 0.99227 (13) | 0.0198 (5) |
| C20 | 0.60999 (17) | 0.84316 (14) | 0.94906 (15) | 0.0331 (6) |
| H20 | 0.5805       | 0.8561       | 0.8963       | 0.040*     |
| C21 | 0.5741 (2)   | 0.79066 (16) | 0.98206 (18) | 0.0453 (7) |
| H21 | 0.5199       | 0.7680       | 0.9520       | 0.054*     |
| C22 | 0.6165 (2)   | 0.77119 (15) | 1.05805 (17) | 0.0414 (7) |
| H22 | 0.5916       | 0.7352       | 1.0808       | 0.050*     |
| C23 | 0.69494 (19) | 0.80390 (14) | 1.10113 (15) | 0.0347 (6) |
| H23 | 0.7246       | 0.7901       | 1.1536       | 0.042*     |
| C24 | 0.73134 (17) | 0.85690 (13) | 1.06869 (14) | 0.0278 (5) |
| H24 | 0.7856       | 0.8793       | 1.0990       | 0.033*     |
| C25 | 0.85068 (14) | 0.93931 (12) | 0.99768 (12) | 0.0199 (5) |
| C26 | 0.89399 (15) | 0.88231 (13) | 0.97767 (14) | 0.0262 (5) |
| H26 | 0.8623       | 0.8507       | 0.9362       | 0.031*     |

|     |              |              |              |             |
|-----|--------------|--------------|--------------|-------------|
| C27 | 0.98355 (16) | 0.87119 (15) | 1.01792 (15) | 0.0337 (6)  |
| H27 | 1.0126       | 0.8313       | 1.0048       | 0.040*      |
| C28 | 1.03038 (16) | 0.91813 (15) | 1.07701 (14) | 0.0339 (6)  |
| H28 | 1.0918       | 0.9111       | 1.1041       | 0.041*      |
| C29 | 0.98759 (17) | 0.97505 (16) | 1.09625 (14) | 0.0362 (6)  |
| H29 | 1.0199       | 1.0074       | 1.1367       | 0.043*      |
| C30 | 0.89776 (16) | 0.98607 (14) | 1.05734 (14) | 0.0294 (5)  |
| H30 | 0.8688       | 1.0254       | 1.0715       | 0.035*      |
| C31 | 0.69968 (15) | 1.03275 (12) | 0.97436 (13) | 0.0230 (5)  |
| C32 | 0.6678 (2)   | 1.03934 (16) | 1.03316 (18) | 0.0508 (8)  |
| H32 | 0.6639       | 0.9976       | 1.0620       | 0.061*      |
| C33 | 0.6413 (3)   | 1.10682 (19) | 1.0501 (2)   | 0.0748 (13) |
| H33 | 0.6188       | 1.1110       | 1.0904       | 0.090*      |
| C34 | 0.6473 (2)   | 1.16778 (17) | 1.0094 (2)   | 0.0591 (9)  |
| H34 | 0.6300       | 1.2141       | 1.0221       | 0.071*      |
| C35 | 0.6782 (2)   | 1.16171 (15) | 0.95101 (18) | 0.0455 (7)  |
| H35 | 0.6818       | 1.2038       | 0.9224       | 0.055*      |
| C36 | 0.70432 (18) | 1.09454 (13) | 0.93301 (16) | 0.0337 (6)  |
| H36 | 0.7256       | 1.0907       | 0.8920       | 0.040*      |
| C37 | 0.92970 (14) | 0.86194 (12) | 0.60896 (13) | 0.0218 (5)  |
| C38 | 0.85169 (16) | 0.82279 (13) | 0.57658 (15) | 0.0305 (6)  |
| H38 | 0.8176       | 0.8115       | 0.6070       | 0.037*      |
| C39 | 0.82346 (18) | 0.80024 (14) | 0.50016 (16) | 0.0384 (7)  |
| H39 | 0.7705       | 0.7730       | 0.4786       | 0.046*      |
| C40 | 0.8715 (2)   | 0.81704 (15) | 0.45558 (16) | 0.0406 (7)  |
| H40 | 0.8517       | 0.8018       | 0.4031       | 0.049*      |
| C41 | 0.9487 (2)   | 0.85602 (17) | 0.48707 (16) | 0.0447 (7)  |
| H41 | 0.9821       | 0.8676       | 0.4561       | 0.054*      |

|      |              |              |              |             |
|------|--------------|--------------|--------------|-------------|
| C42  | 0.97789 (17) | 0.87838 (15) | 0.56348 (15) | 0.0346 (6)  |
| H42  | 1.0313       | 0.9051       | 0.5848       | 0.041*      |
| C43  | 1.03520 (14) | 0.81345 (12) | 0.76208 (14) | 0.0230 (5)  |
| C44  | 1.06567 (16) | 0.75935 (14) | 0.72631 (16) | 0.0318 (6)  |
| H44  | 1.0489       | 0.7597       | 0.6716       | 0.038*      |
| C45  | 1.12050 (18) | 0.70456 (15) | 0.76967 (19) | 0.0408 (7)  |
| H45  | 1.1406       | 0.6673       | 0.7447       | 0.049*      |
| C46  | 1.14551 (18) | 0.70429 (15) | 0.8484 (2)   | 0.0468 (8)  |
| H46  | 1.1840       | 0.6673       | 0.8780       | 0.056*      |
| C47  | 1.1153 (2)   | 0.75738 (17) | 0.88496 (19) | 0.0522 (9)  |
| H47  | 1.1327       | 0.7568       | 0.9397       | 0.063*      |
| C48  | 1.05948 (19) | 0.81149 (15) | 0.84194 (15) | 0.0380 (6)  |
| H48  | 1.0377       | 0.8475       | 0.8672       | 0.046*      |
| C49  | 1.04025 (14) | 0.96375 (12) | 0.72028 (12) | 0.0186 (4)  |
| C50  | 1.00609 (15) | 1.03419 (12) | 0.70952 (13) | 0.0231 (5)  |
| H50  | 0.9451       | 1.0416       | 0.6989       | 0.028*      |
| C51  | 1.06014 (16) | 1.09348 (13) | 0.71415 (15) | 0.0285 (5)  |
| H51  | 1.0362       | 1.1414       | 0.7064       | 0.034*      |
| C52  | 1.14885 (16) | 1.08309 (13) | 0.72997 (14) | 0.0290 (5)  |
| H52  | 1.1858       | 1.1239       | 0.7324       | 0.035*      |
| C53  | 1.18394 (16) | 1.01391 (14) | 0.74220 (16) | 0.0339 (6)  |
| H53  | 1.2452       | 1.0070       | 0.7539       | 0.041*      |
| C54  | 1.13015 (15) | 0.95430 (14) | 0.73758 (15) | 0.0293 (5)  |
| H54  | 1.1547       | 0.9066       | 0.7463       | 0.035*      |
| C55  | 0.8296 (2)   | 0.0270 (2)   | 0.4828 (2)   | 0.0661 (10) |
| H55A | 0.8096       | -0.0113      | 0.4424       | 0.079*      |
| H55B | 0.8942       | 0.0221       | 0.5093       | 0.079*      |



Geometric parameters (Å, °)

|         |            |         |           |
|---------|------------|---------|-----------|
| Ag1—P2  | 2.4399 (6) | C23—C24 | 1.387 (3) |
| Ag1—P1  | 2.4500 (6) | C23—H23 | 0.9500    |
| Ag1—Br1 | 2.7670 (3) | C24—H24 | 0.9500    |
| Ag1—Br2 | 2.8097 (3) | C25—C26 | 1.386 (3) |
| Ag1—Ag2 | 3.3174 (3) | C25—C30 | 1.388 (3) |
| Ag2—P3  | 2.3942 (6) | C26—C27 | 1.390 (3) |
| Ag2—Br2 | 2.5925 (3) | C26—H26 | 0.9500    |
| Ag2—Br1 | 2.6364 (3) | C27—C28 | 1.383 (4) |
| Cl1—C55 | 1.743 (4)  | C27—H27 | 0.9500    |
| Cl2—C55 | 1.759 (4)  | C28—C29 | 1.373 (4) |
| P1—C1   | 1.820 (2)  | C28—H28 | 0.9500    |
| P1—C7   | 1.823 (2)  | C29—C30 | 1.390 (4) |
| P1—C13  | 1.830 (2)  | C29—H29 | 0.9500    |
| P2—C19  | 1.818 (2)  | C30—H30 | 0.9500    |
| P2—C25  | 1.821 (2)  | C31—C32 | 1.378 (4) |
| P2—C31  | 1.822 (2)  | C31—C36 | 1.386 (3) |
| P3—C37  | 1.816 (2)  | C32—C33 | 1.384 (4) |
| P3—C43  | 1.819 (2)  | C32—H32 | 0.9500    |
| P3—C49  | 1.819 (2)  | C33—C34 | 1.372 (5) |
| C1—C2   | 1.388 (3)  | C33—H33 | 0.9500    |
| C1—C6   | 1.393 (3)  | C34—C35 | 1.359 (4) |
| C2—C3   | 1.384 (3)  | C34—H34 | 0.9500    |
| C2—H2   | 0.9500     | C35—C36 | 1.383 (4) |
| C3—C4   | 1.381 (3)  | C35—H35 | 0.9500    |
| C3—H3   | 0.9500     | C36—H36 | 0.9500    |
| C4—C5   | 1.374 (4)  | C37—C42 | 1.383 (3) |
| C4—H4   | 0.9500     | C37—C38 | 1.390 (3) |

|         |           |         |           |
|---------|-----------|---------|-----------|
| C5—C6   | 1.385 (3) | C38—C39 | 1.385 (4) |
| C5—H5   | 0.9500    | C38—H38 | 0.9500    |
| C6—H6   | 0.9500    | C39—C40 | 1.369 (4) |
| C7—C8   | 1.382 (3) | C39—H39 | 0.9500    |
| C7—C12  | 1.397 (3) | C40—C41 | 1.376 (4) |
| C8—C9   | 1.392 (3) | C40—H40 | 0.9500    |
| C8—H8   | 0.9500    | C41—C42 | 1.383 (4) |
| C9—C10  | 1.378 (4) | C41—H41 | 0.9500    |
| C9—H9   | 0.9500    | C42—H42 | 0.9500    |
| C10—C11 | 1.379 (4) | C43—C44 | 1.384 (3) |
| C10—H10 | 0.9500    | C43—C48 | 1.389 (4) |
| C11—C12 | 1.382 (3) | C44—C45 | 1.388 (4) |
| C11—H11 | 0.9500    | C44—H44 | 0.9500    |
| C12—H12 | 0.9500    | C45—C46 | 1.366 (4) |
| C13—C18 | 1.379 (3) | C45—H45 | 0.9500    |
| C13—C14 | 1.391 (3) | C46—C47 | 1.378 (5) |
| C14—C15 | 1.380 (3) | C46—H46 | 0.9500    |
| C14—H14 | 0.9500    | C47—C48 | 1.384 (4) |
| C15—C16 | 1.373 (3) | C47—H47 | 0.9500    |
| C15—H15 | 0.9500    | C48—H48 | 0.9500    |
| C16—C17 | 1.374 (4) | C49—C50 | 1.390 (3) |
| C16—H16 | 0.9500    | C49—C54 | 1.392 (3) |
| C17—C18 | 1.386 (3) | C50—C51 | 1.382 (3) |
| C17—H17 | 0.9500    | C50—H50 | 0.9500    |
| C18—H18 | 0.9500    | C51—C52 | 1.380 (3) |
| C19—C24 | 1.383 (3) | C51—H51 | 0.9500    |
| C19—C20 | 1.386 (3) | C52—C53 | 1.375 (4) |
| C20—C21 | 1.381 (4) | C52—H52 | 0.9500    |

|             |              |             |             |
|-------------|--------------|-------------|-------------|
| C20—H20     | 0.9500       | C53—C54     | 1.384 (3)   |
| C21—C22     | 1.371 (4)    | C53—H53     | 0.9500      |
| C21—H21     | 0.9500       | C54—H54     | 0.9500      |
| C22—C23     | 1.373 (4)    | C55—H55A    | 0.9900      |
| C22—H22     | 0.9500       | C55—H55B    | 0.9900      |
| P2—Ag1—P1   | 128.464 (19) | C22—C23—C24 | 120.6 (2)   |
| P2—Ag1—Br1  | 106.548 (15) | C22—C23—H23 | 119.7       |
| P1—Ag1—Br1  | 105.342 (15) | C24—C23—H23 | 119.7       |
| P2—Ag1—Br2  | 105.340 (15) | C19—C24—C23 | 120.0 (2)   |
| P1—Ag1—Br2  | 108.382 (15) | C19—C24—H24 | 120.0       |
| Br1—Ag1—Br2 | 98.968 (9)   | C23—C24—H24 | 120.0       |
| P2—Ag1—Ag2  | 108.613 (15) | C26—C25—C30 | 119.5 (2)   |
| P1—Ag1—Ag2  | 122.916 (14) | C26—C25—P2  | 116.83 (17) |
| Br1—Ag1—Ag2 | 50.365 (6)   | C30—C25—P2  | 123.62 (18) |
| Br2—Ag1—Ag2 | 49.210 (6)   | C25—C26—C27 | 120.3 (2)   |
| P3—Ag2—Br2  | 131.852 (17) | C25—C26—H26 | 119.8       |
| P3—Ag2—Br1  | 119.516 (16) | C27—C26—H26 | 119.8       |
| Br2—Ag2—Br1 | 108.344 (9)  | C28—C27—C26 | 120.0 (2)   |
| P3—Ag2—Ag1  | 172.659 (16) | C28—C27—H27 | 120.0       |
| Br2—Ag2—Ag1 | 55.137 (6)   | C26—C27—H27 | 120.0       |
| Br1—Ag2—Ag1 | 53.926 (7)   | C29—C28—C27 | 119.6 (2)   |
| Ag2—Br1—Ag1 | 75.709 (8)   | C29—C28—H28 | 120.2       |
| Ag2—Br2—Ag1 | 75.652 (8)   | C27—C28—H28 | 120.2       |
| C1—P1—C7    | 105.94 (10)  | C28—C29—C30 | 121.0 (2)   |
| C1—P1—C13   | 103.62 (10)  | C28—C29—H29 | 119.5       |
| C7—P1—C13   | 103.05 (10)  | C30—C29—H29 | 119.5       |
| C1—P1—Ag1   | 115.03 (7)   | C25—C30—C29 | 119.6 (2)   |
| C7—P1—Ag1   | 109.83 (7)   | C25—C30—H30 | 120.2       |

|            |             |             |             |
|------------|-------------|-------------|-------------|
| C13—P1—Ag1 | 118.08 (7)  | C29—C30—H30 | 120.2       |
| C19—P2—C25 | 102.84 (10) | C32—C31—C36 | 118.8 (2)   |
| C19—P2—C31 | 104.68 (10) | C32—C31—P2  | 123.3 (2)   |
| C25—P2—C31 | 105.41 (11) | C36—C31—P2  | 117.88 (18) |
| C19—P2—Ag1 | 109.57 (8)  | C31—C32—C33 | 120.0 (3)   |
| C25—P2—Ag1 | 119.11 (7)  | C31—C32—H32 | 120.0       |
| C31—P2—Ag1 | 113.79 (8)  | C33—C32—H32 | 120.0       |
| C37—P3—C43 | 104.37 (11) | C34—C33—C32 | 120.7 (3)   |
| C37—P3—C49 | 104.54 (10) | C34—C33—H33 | 119.7       |
| C43—P3—C49 | 104.18 (10) | C32—C33—H33 | 119.7       |
| C37—P3—Ag2 | 110.78 (7)  | C35—C34—C33 | 119.7 (3)   |
| C43—P3—Ag2 | 115.49 (8)  | C35—C34—H34 | 120.1       |
| C49—P3—Ag2 | 116.25 (7)  | C33—C34—H34 | 120.1       |
| C2—C1—C6   | 118.9 (2)   | C34—C35—C36 | 120.3 (3)   |
| C2—C1—P1   | 117.74 (16) | C34—C35—H35 | 119.9       |
| C6—C1—P1   | 123.40 (17) | C36—C35—H35 | 119.9       |
| C3—C2—C1   | 120.3 (2)   | C35—C36—C31 | 120.5 (3)   |
| C3—C2—H2   | 119.9       | C35—C36—H36 | 119.7       |
| C1—C2—H2   | 119.9       | C31—C36—H36 | 119.7       |
| C4—C3—C2   | 120.4 (2)   | C42—C37—C38 | 118.9 (2)   |
| C4—C3—H3   | 119.8       | C42—C37—P3  | 122.88 (18) |
| C2—C3—H3   | 119.8       | C38—C37—P3  | 118.20 (19) |
| C5—C4—C3   | 119.7 (2)   | C39—C38—C37 | 120.3 (3)   |
| C5—C4—H4   | 120.2       | C39—C38—H38 | 119.9       |
| C3—C4—H4   | 120.2       | C37—C38—H38 | 119.9       |
| C4—C5—C6   | 120.4 (2)   | C40—C39—C38 | 120.3 (2)   |
| C4—C5—H5   | 119.8       | C40—C39—H39 | 119.8       |
| C6—C5—H5   | 119.8       | C38—C39—H39 | 119.8       |

|             |             |             |             |
|-------------|-------------|-------------|-------------|
| C5—C6—C1    | 120.3 (2)   | C39—C40—C41 | 119.8 (3)   |
| C5—C6—H6    | 119.8       | C39—C40—H40 | 120.1       |
| C1—C6—H6    | 119.8       | C41—C40—H40 | 120.1       |
| C8—C7—C12   | 118.9 (2)   | C40—C41—C42 | 120.4 (3)   |
| C8—C7—P1    | 123.80 (18) | C40—C41—H41 | 119.8       |
| C12—C7—P1   | 117.35 (17) | C42—C41—H41 | 119.8       |
| C7—C8—C9    | 120.0 (2)   | C37—C42—C41 | 120.3 (2)   |
| C7—C8—H8    | 120.0       | C37—C42—H42 | 119.9       |
| C9—C8—H8    | 120.0       | C41—C42—H42 | 119.9       |
| C10—C9—C8   | 120.5 (2)   | C44—C43—C48 | 118.9 (2)   |
| C10—C9—H9   | 119.8       | C44—C43—P3  | 123.51 (19) |
| C8—C9—H9    | 119.8       | C48—C43—P3  | 117.58 (18) |
| C9—C10—C11  | 120.1 (2)   | C43—C44—C45 | 120.5 (3)   |
| C9—C10—H10  | 119.9       | C43—C44—H44 | 119.7       |
| C11—C10—H10 | 119.9       | C45—C44—H44 | 119.7       |
| C10—C11—C12 | 119.5 (2)   | C46—C45—C44 | 119.9 (3)   |
| C10—C11—H11 | 120.2       | C46—C45—H45 | 120.0       |
| C12—C11—H11 | 120.2       | C44—C45—H45 | 120.0       |
| C11—C12—C7  | 121.0 (2)   | C45—C46—C47 | 120.4 (3)   |
| C11—C12—H12 | 119.5       | C45—C46—H46 | 119.8       |
| C7—C12—H12  | 119.5       | C47—C46—H46 | 119.8       |
| C18—C13—C14 | 118.3 (2)   | C46—C47—C48 | 120.0 (3)   |
| C18—C13—P1  | 123.57 (17) | C46—C47—H47 | 120.0       |
| C14—C13—P1  | 118.08 (16) | C48—C47—H47 | 120.0       |
| C15—C14—C13 | 120.7 (2)   | C47—C48—C43 | 120.3 (3)   |
| C15—C14—H14 | 119.7       | C47—C48—H48 | 119.9       |
| C13—C14—H14 | 119.7       | C43—C48—H48 | 119.9       |
| C16—C15—C14 | 120.6 (2)   | C50—C49—C54 | 118.8 (2)   |

|                |              |                 |             |
|----------------|--------------|-----------------|-------------|
| C16—C15—H15    | 119.7        | C50—C49—P3      | 118.17 (16) |
| C14—C15—H15    | 119.7        | C54—C49—P3      | 123.07 (17) |
| C15—C16—C17    | 119.1 (2)    | C51—C50—C49     | 120.5 (2)   |
| C15—C16—H16    | 120.4        | C51—C50—H50     | 119.7       |
| C17—C16—H16    | 120.4        | C49—C50—H50     | 119.7       |
| C16—C17—C18    | 120.7 (2)    | C52—C51—C50     | 120.0 (2)   |
| C16—C17—H17    | 119.7        | C52—C51—H51     | 120.0       |
| C18—C17—H17    | 119.7        | C50—C51—H51     | 120.0       |
| C13—C18—C17    | 120.6 (2)    | C53—C52—C51     | 120.2 (2)   |
| C13—C18—H18    | 119.7        | C53—C52—H52     | 119.9       |
| C17—C18—H18    | 119.7        | C51—C52—H52     | 119.9       |
| C24—C19—C20    | 118.9 (2)    | C52—C53—C54     | 120.1 (2)   |
| C24—C19—P2     | 122.81 (18)  | C52—C53—H53     | 120.0       |
| C20—C19—P2     | 118.32 (17)  | C54—C53—H53     | 120.0       |
| C21—C20—C19    | 120.6 (2)    | C53—C54—C49     | 120.4 (2)   |
| C21—C20—H20    | 119.7        | C53—C54—H54     | 119.8       |
| C19—C20—H20    | 119.7        | C49—C54—H54     | 119.8       |
| C22—C21—C20    | 120.2 (3)    | C11—C55—C12     | 112.08 (18) |
| C22—C21—H21    | 119.9        | C11—C55—H55A    | 109.2       |
| C20—C21—H21    | 119.9        | C12—C55—H55A    | 109.2       |
| C21—C22—C23    | 119.7 (2)    | C11—C55—H55B    | 109.2       |
| C21—C22—H22    | 120.2        | C12—C55—H55B    | 109.2       |
| C23—C22—H22    | 120.2        | H55A—C55—H55B   | 107.9       |
| P2—Ag1—Ag2—P3  | 68.57 (13)   | C14—C15—C16—C17 | 0.4 (4)     |
| P1—Ag1—Ag2—P3  | -110.52 (13) | C15—C16—C17—C18 | 0.4 (4)     |
| Br1—Ag1—Ag2—P3 | -27.82 (12)  | C14—C13—C18—C17 | -0.3 (4)    |
| Br2—Ag1—Ag2—P3 | 163.05 (13)  | P1—C13—C18—C17  | -179.3 (2)  |
| P2—Ag1—Ag2—Br2 | -94.479 (17) | C16—C17—C18—C13 | -0.5 (5)    |

|                 |               |                 |              |
|-----------------|---------------|-----------------|--------------|
| P1—Ag1—Ag2—Br2  | 86.423 (18)   | C25—P2—C19—C24  | 28.2 (2)     |
| Br1—Ag1—Ag2—Br2 | 169.131 (11)  | C31—P2—C19—C24  | -81.8 (2)    |
| P2—Ag1—Ag2—Br1  | 96.390 (16)   | Ag1—P2—C19—C24  | 155.81 (17)  |
| P1—Ag1—Ag2—Br1  | -82.708 (18)  | C25—P2—C19—C20  | -150.80 (19) |
| Br2—Ag1—Ag2—Br1 | -169.131 (11) | C31—P2—C19—C20  | 99.2 (2)     |
| P3—Ag2—Br1—Ag1  | 176.072 (18)  | Ag1—P2—C19—C20  | -23.2 (2)    |
| Br2—Ag2—Br1—Ag1 | -9.381 (9)    | C24—C19—C20—C21 | 1.0 (4)      |
| P2—Ag1—Br1—Ag2  | -100.733 (16) | P2—C19—C20—C21  | -180.0 (2)   |
| P1—Ag1—Br1—Ag2  | 120.294 (15)  | C19—C20—C21—C22 | -0.5 (5)     |
| Br2—Ag1—Br1—Ag2 | 8.310 (8)     | C20—C21—C22—C23 | -0.3 (5)     |
| P3—Ag2—Br2—Ag1  | -177.13 (2)   | C21—C22—C23—C24 | 0.6 (4)      |
| Br1—Ag2—Br2—Ag1 | 9.240 (9)     | C20—C19—C24—C23 | -0.7 (3)     |
| P2—Ag1—Br2—Ag2  | 101.562 (16)  | P2—C19—C24—C23  | -179.67 (18) |
| P1—Ag1—Br2—Ag2  | -118.008 (15) | C22—C23—C24—C19 | -0.1 (4)     |
| Br1—Ag1—Br2—Ag2 | -8.454 (8)    | C19—P2—C25—C26  | 79.11 (19)   |
| P2—Ag1—P1—C1    | 177.76 (8)    | C31—P2—C25—C26  | -171.47 (18) |
| Br1—Ag1—P1—C1   | -55.72 (8)    | Ag1—P2—C25—C26  | -42.2 (2)    |
| Br2—Ag1—P1—C1   | 49.44 (8)     | C19—P2—C25—C30  | -98.4 (2)    |
| Ag2—Ag1—P1—C1   | -3.33 (8)     | C31—P2—C25—C30  | 11.0 (2)     |
| P2—Ag1—P1—C7    | 58.38 (8)     | Ag1—P2—C25—C30  | 140.24 (18)  |
| Br1—Ag1—P1—C7   | -175.10 (7)   | C30—C25—C26—C27 | 1.2 (4)      |
| Br2—Ag1—P1—C7   | -69.94 (8)    | P2—C25—C26—C27  | -176.43 (19) |
| Ag2—Ag1—P1—C7   | -122.71 (7)   | C25—C26—C27—C28 | -1.6 (4)     |
| P2—Ag1—P1—C13   | -59.30 (8)    | C26—C27—C28—C29 | 0.9 (4)      |
| Br1—Ag1—P1—C13  | 67.22 (8)     | C27—C28—C29—C30 | 0.2 (4)      |
| Br2—Ag1—P1—C13  | 172.38 (8)    | C26—C25—C30—C29 | -0.1 (4)     |
| Ag2—Ag1—P1—C13  | 119.61 (8)    | P2—C25—C30—C29  | 177.35 (19)  |
| P1—Ag1—P2—C19   | 53.46 (8)     | C28—C29—C30—C25 | -0.6 (4)     |

|                |              |                 |              |
|----------------|--------------|-----------------|--------------|
| Br1—Ag1—P2—C19 | -72.59 (8)   | C19—P2—C31—C32  | 13.0 (3)     |
| Br2—Ag1—P2—C19 | -177.08 (8)  | C25—P2—C31—C32  | -95.1 (3)    |
| Ag2—Ag1—P2—C19 | -125.57 (8)  | Ag1—P2—C31—C32  | 132.6 (2)    |
| P1—Ag1—P2—C25  | 171.36 (8)   | C19—P2—C31—C36  | -164.4 (2)   |
| Br1—Ag1—P2—C25 | 45.31 (9)    | C25—P2—C31—C36  | 87.5 (2)     |
| Br2—Ag1—P2—C25 | -59.17 (9)   | Ag1—P2—C31—C36  | -44.8 (2)    |
| Ag2—Ag1—P2—C25 | -7.67 (9)    | C36—C31—C32—C33 | -0.2 (5)     |
| P1—Ag1—P2—C31  | -63.33 (9)   | P2—C31—C32—C33  | -177.6 (3)   |
| Br1—Ag1—P2—C31 | 170.62 (8)   | C31—C32—C33—C34 | -0.7 (6)     |
| Br2—Ag1—P2—C31 | 66.13 (9)    | C32—C33—C34—C35 | 1.1 (7)      |
| Ag2—Ag1—P2—C31 | 117.64 (9)   | C33—C34—C35—C36 | -0.7 (6)     |
| Br2—Ag2—P3—C37 | -91.51 (8)   | C34—C35—C36—C31 | -0.2 (5)     |
| Br1—Ag2—P3—C37 | 81.53 (8)    | C32—C31—C36—C35 | 0.6 (4)      |
| Ag1—Ag2—P3—C37 | 107.21 (14)  | P2—C31—C36—C35  | 178.1 (2)    |
| Br2—Ag2—P3—C43 | 150.12 (8)   | C43—P3—C37—C42  | -87.4 (2)    |
| Br1—Ag2—P3—C43 | -36.83 (9)   | C49—P3—C37—C42  | 21.8 (2)     |
| Ag1—Ag2—P3—C43 | -11.15 (17)  | Ag2—P3—C37—C42  | 147.7 (2)    |
| Br2—Ag2—P3—C49 | 27.59 (9)    | C43—P3—C37—C38  | 91.7 (2)     |
| Br1—Ag2—P3—C49 | -159.36 (8)  | C49—P3—C37—C38  | -159.20 (18) |
| Ag1—Ag2—P3—C49 | -133.68 (13) | Ag2—P3—C37—C38  | -33.3 (2)    |
| C7—P1—C1—C2    | 102.71 (18)  | C42—C37—C38—C39 | 0.5 (4)      |
| C13—P1—C1—C2   | -149.18 (17) | P3—C37—C38—C39  | -178.52 (19) |
| Ag1—P1—C1—C2   | -18.81 (19)  | C37—C38—C39—C40 | -0.8 (4)     |
| C7—P1—C1—C6    | -76.6 (2)    | C38—C39—C40—C41 | 0.5 (4)      |
| C13—P1—C1—C6   | 31.5 (2)     | C39—C40—C41—C42 | 0.0 (5)      |
| Ag1—P1—C1—C6   | 161.84 (16)  | C38—C37—C42—C41 | -0.1 (4)     |
| C6—C1—C2—C3    | 0.3 (3)      | P3—C37—C42—C41  | 179.0 (2)    |
| P1—C1—C2—C3    | -179.11 (19) | C40—C41—C42—C37 | -0.2 (5)     |



|                 |              |                 |              |
|-----------------|--------------|-----------------|--------------|
| C1—C2—C3—C4     | 1.3 (4)      | C37—P3—C43—C44  | 11.5 (2)     |
| C2—C3—C4—C5     | -1.7 (4)     | C49—P3—C43—C44  | -97.9 (2)    |
| C3—C4—C5—C6     | 0.6 (4)      | Ag2—P3—C43—C44  | 133.35 (19)  |
| C4—C5—C6—C1     | 0.9 (4)      | C37—P3—C43—C48  | -168.7 (2)   |
| C2—C1—C6—C5     | -1.3 (3)     | C49—P3—C43—C48  | 81.9 (2)     |
| P1—C1—C6—C5     | 178.00 (18)  | Ag2—P3—C43—C48  | -46.8 (2)    |
| C1—P1—C7—C8     | 11.3 (2)     | C48—C43—C44—C45 | -0.8 (4)     |
| C13—P1—C7—C8    | -97.2 (2)    | P3—C43—C44—C45  | 179.01 (19)  |
| Ag1—P1—C7—C8    | 136.12 (18)  | C43—C44—C45—C46 | -0.7 (4)     |
| C1—P1—C7—C12    | -168.51 (17) | C44—C45—C46—C47 | 1.2 (4)      |
| C13—P1—C7—C12   | 82.96 (19)   | C45—C46—C47—C48 | -0.2 (5)     |
| Ag1—P1—C7—C12   | -43.71 (19)  | C46—C47—C48—C43 | -1.3 (5)     |
| C12—C7—C8—C9    | 0.5 (3)      | C44—C43—C48—C47 | 1.8 (4)      |
| P1—C7—C8—C9     | -179.35 (18) | P3—C43—C48—C47  | -178.0 (2)   |
| C7—C8—C9—C10    | -1.2 (4)     | C37—P3—C49—C50  | 91.38 (19)   |
| C8—C9—C10—C11   | 0.7 (4)      | C43—P3—C49—C50  | -159.35 (18) |
| C9—C10—C11—C12  | 0.5 (4)      | Ag2—P3—C49—C50  | -31.1 (2)    |
| C10—C11—C12—C7  | -1.2 (4)     | C37—P3—C49—C54  | -88.0 (2)    |
| C8—C7—C12—C11   | 0.7 (3)      | C43—P3—C49—C54  | 21.3 (2)     |
| P1—C7—C12—C11   | -179.43 (19) | Ag2—P3—C49—C54  | 149.53 (18)  |
| C1—P1—C13—C18   | -104.5 (2)   | C54—C49—C50—C51 | 1.5 (3)      |
| C7—P1—C13—C18   | 5.7 (2)      | P3—C49—C50—C51  | -177.93 (18) |
| Ag1—P1—C13—C18  | 126.93 (19)  | C49—C50—C51—C52 | -0.3 (4)     |
| C1—P1—C13—C14   | 76.4 (2)     | C50—C51—C52—C53 | -0.9 (4)     |
| C7—P1—C13—C14   | -173.33 (19) | C51—C52—C53—C54 | 1.0 (4)      |
| Ag1—P1—C13—C14  | -52.1 (2)    | C52—C53—C54—C49 | 0.2 (4)      |
| C18—C13—C14—C15 | 1.1 (4)      | C50—C49—C54—C53 | -1.4 (4)     |
| P1—C13—C14—C15  | -179.8 (2)   | P3—C49—C54—C53  | 178.0 (2)    |

C13—C14—C15—C16

-1.2 (4)

## 5. $^{19}\text{F}$ NMR monitoring of the reaction course

$^{19}\text{F}$  NMR monitoring of the reaction of  $\text{TMSCF}_3$  (3 equiv) with  $\text{phenCu}(\text{PPh}_3)\text{Br}$  (1 mmol),  $\text{AgF}$  (3 equiv) in the presence of 4,4'-difluorobiphenyl (0.5 equiv) as internal standard in  $\text{CH}_2\text{Cl}_2$  at room temperature. Figures S9, S10 and S11 show the  $^{19}\text{F}$  signals for the reaction after 4, 8, and 18 hours respectively.

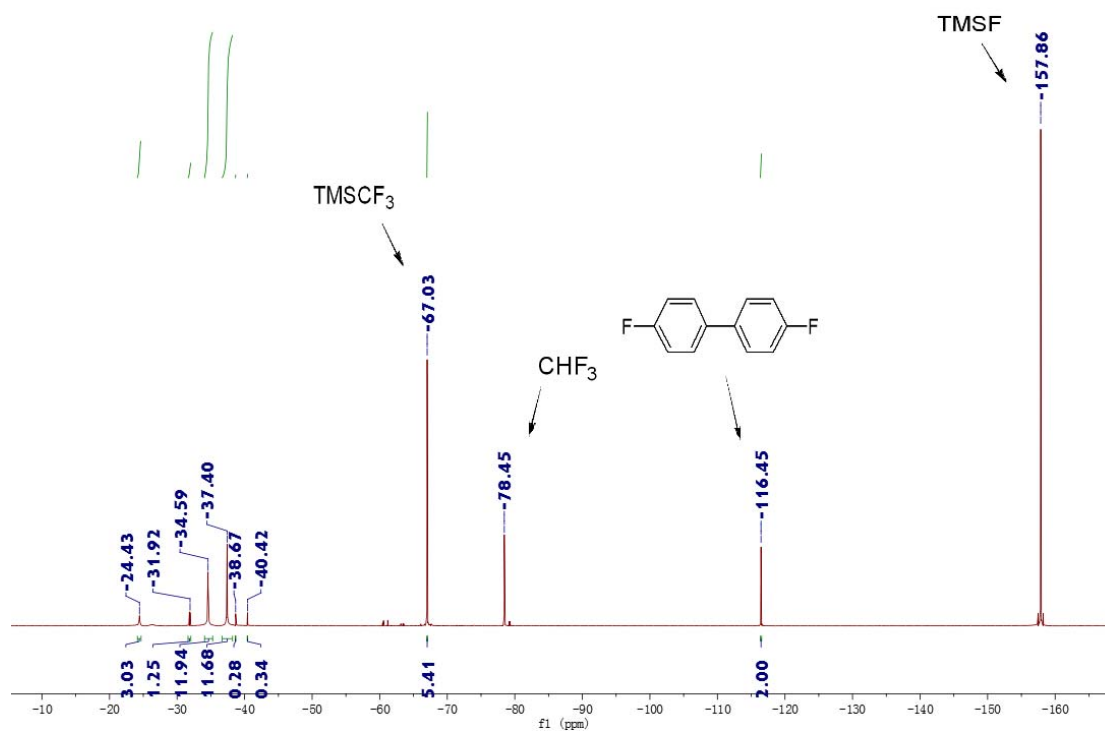

Figure S9.  $^{19}\text{F}$  NMR monitoring of the reaction solution after 4 hours.

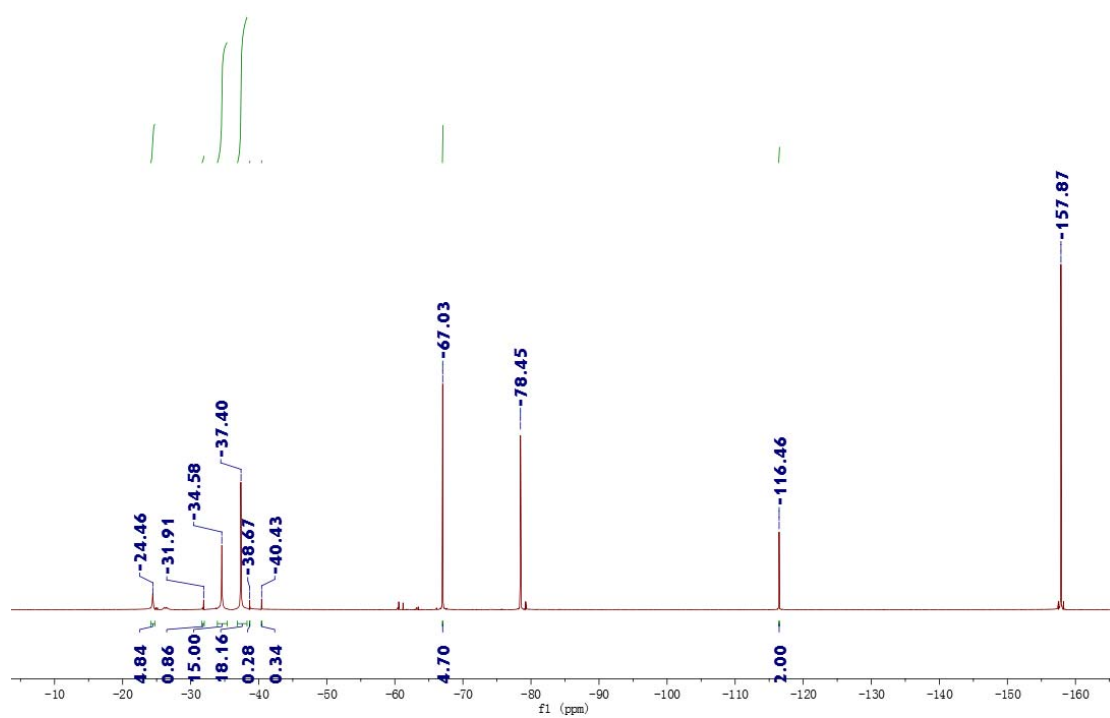

Figure S10.  $^{19}\text{F}$  NMR monitoring of the reaction solution after 8 hours.

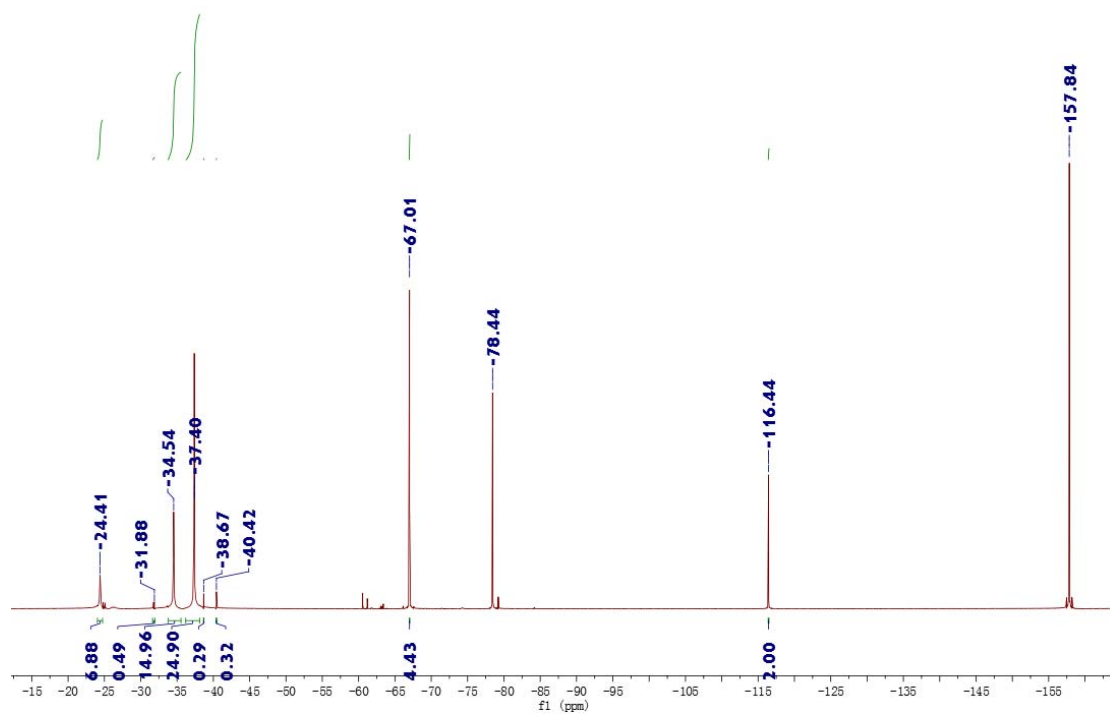

Figure S11.  $^{19}\text{F}$  NMR monitoring of the reaction solution after 18 hours.

## 6. Reaction mechanism relevant

**Scheme S1.** The formation of intermediate **A**

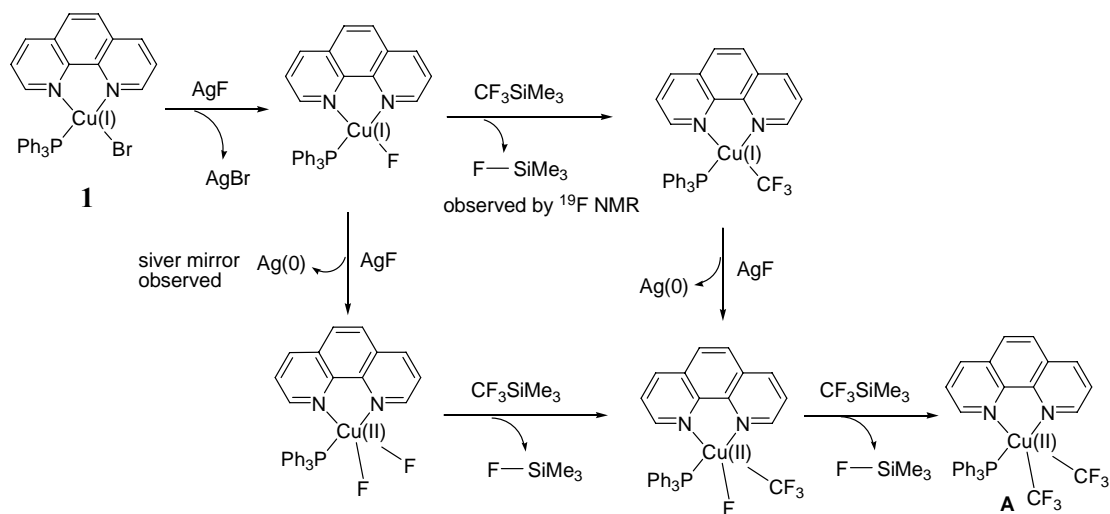

Scheme S1 shows possible mechanisms for the formation of Cu(II) trifluoromethyl intermediate **A**.

**Reaction Procedure for the conversion of 2 to 3 in the presence of additional phen ligand:** Into a 25-mL Schlenk tube equipped with a stir bar were added [phenCu(pph<sub>3</sub>)<sub>2</sub>]<sup>+</sup>[Cu(CF<sub>3</sub>)<sub>4</sub>]<sup>-</sup> (**2**) (166 mg, 0.15mmol) and phen (54 mg, 0.30 mmol). The air in the Schlenk was evacuated and backfilled with dry nitrogen three times. Then, AcOH (1 mL) was added by syringe. The resulting mixture was stirred at 90 °C for 2h under nitrogen. Then, the mixture was allowed to cool to room temperature and diluted with CH<sub>2</sub>Cl<sub>2</sub> (5 mL). The resulting mixture was separated by filtration and washed with brine (2 x 5 mL). The combined organic layers were evaporated with silica gel. The crude mixture was purified by flash silica gel column chromatography with PE/EA (v/v = 2:1) as eluent to give phenCu(CF<sub>3</sub>)<sub>3</sub> (**3**) (31 mg, 45%).

## 7. Reactivity studies of **2** and **3** with boronic acids

### 7.1 Optimization of conditions for reaction of **3** with **6a** (Table 1):

Into a 25-mL Schlenk tube equipped with a stir bar were added (phen)Cu(CF<sub>3</sub>)<sub>3</sub> (**3**) (45 mg, 0.1 mmol), (4-methoxyphenyl)boronic acid (**6a**) (30 mg, 0.2 mmol), additive (0.2 mmol), 4,4'-difluorobiphenyl (internal standard; 38 mg, 0.2 mmol). The air in the Schlenk tube was evacuated and backfilled with dry oxygen. Dry solvent (1 mL) was then added by syringe. The contents in the tube were vigorously stirred for specified time at specified temperature (heated in an oil bath where necessary). The mixture was allowed to cool to room temperature and diluted with ether and filtered through a pad of Celite. The Celite pad was washed with Et<sub>2</sub>O. The combined filtrate and the washings were concentrated to extrude ether, and the residue mixture was analyzed by <sup>19</sup>F NMR spectroscopy to determine the reaction yield (Table 1). Figure S12 shows the quantitative trifluoromethylation of **6a** at RT in 3 hours (entry 10 in Table 1). Figures S13 and S14 are <sup>1</sup>H and <sup>19</sup>F NMR spectra of the isolated product **7a**.

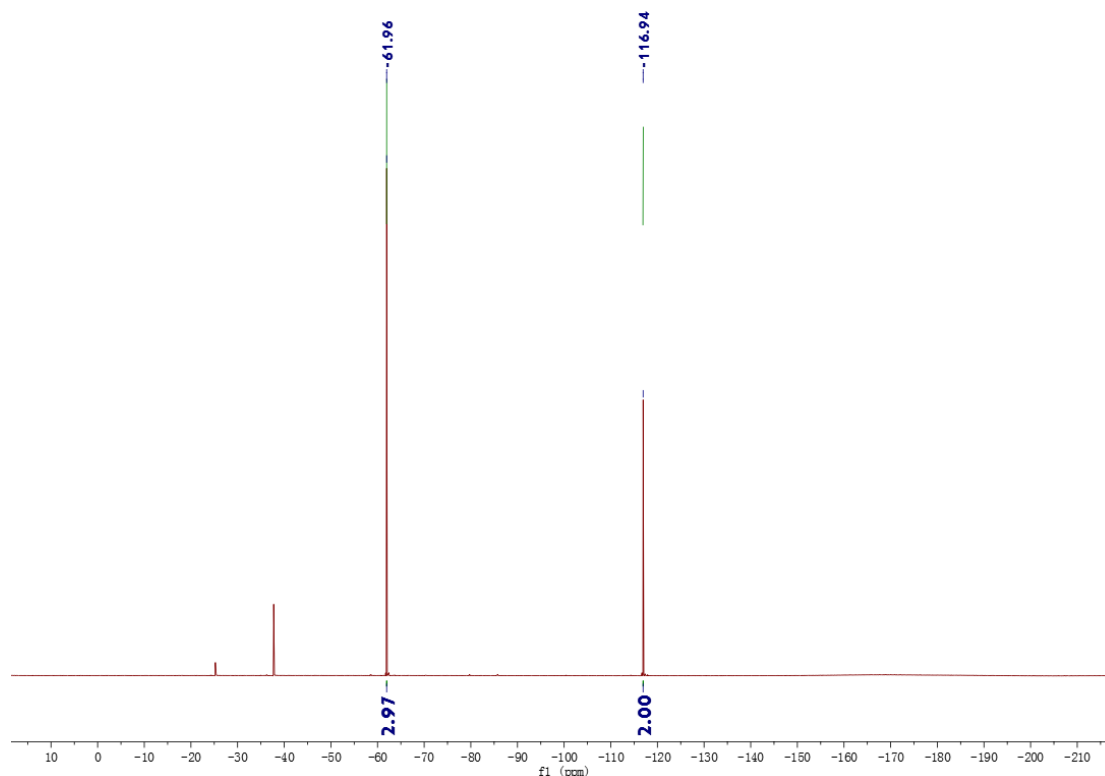

**Figure S12.** <sup>19</sup>F NMR spectrum of reaction solution of **3** with **6a** (entry 10 in Table 1).

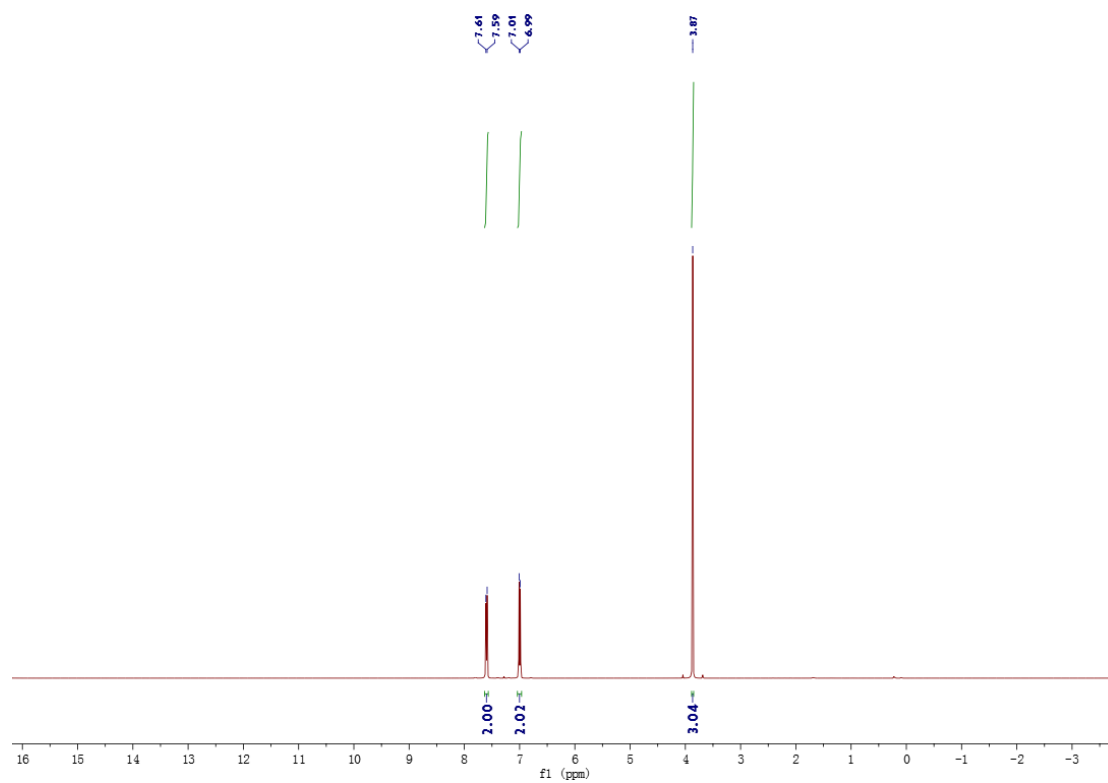

**Figure S13.** <sup>1</sup>H NMR of 4-methoxybenzotrifluoride (**7a**).

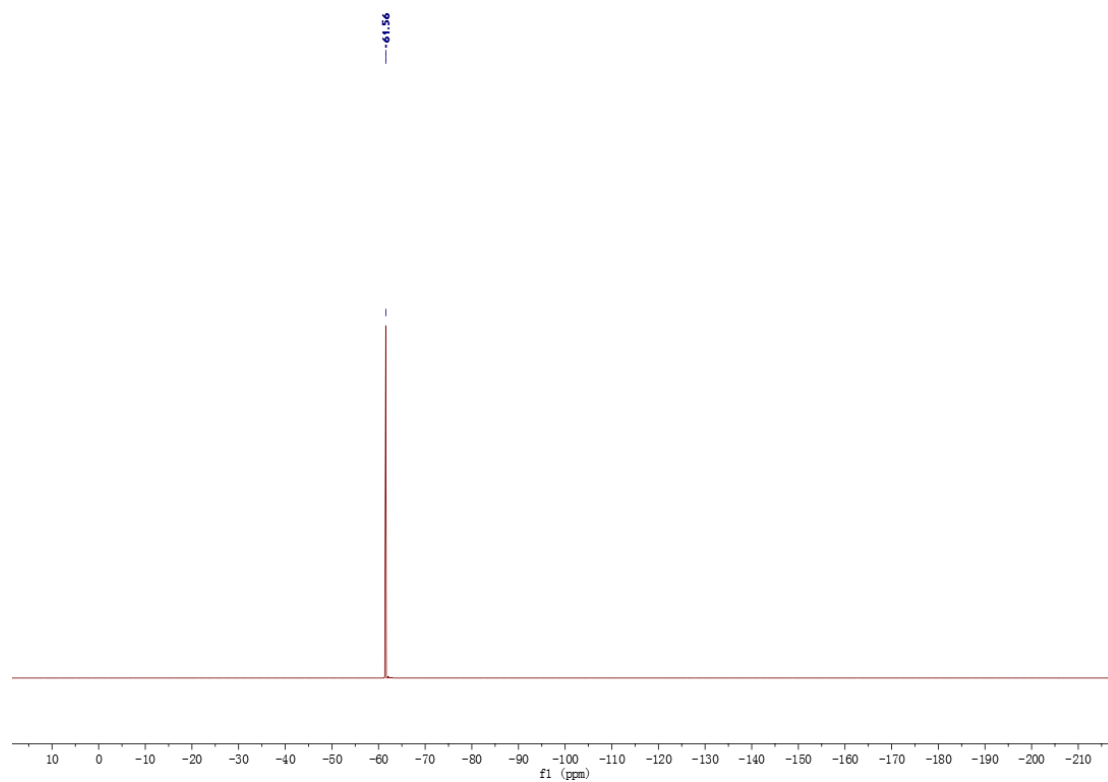

**Figure S14.** <sup>19</sup>F NMR spectrum of 4-methoxybenzotrifluoride (**7a**).

## 7.2 General procedures for reaction of **3** with various boronic acids (Table 2):

**Condition A:** Into a 25-mL Schlenk tube equipped with a stir bar were added (phen)Cu(CF<sub>3</sub>)<sub>3</sub> (**3**) (45 mg, 0.1 mmol), boronic acid (**6**) (0.2 mmol), **KF** (0.2 mmol), 4,4'-difluorobiphenyl (internal standard; 38 mg, 0.2 mmol). The air in the Schlenk tube was evacuated and backfilled with dry oxygen. Dry DMF (1 mL) was then added by syringe. The contents in the tube were vigorously stirred **at room temperature** for 3 hours. The mixture was then diluted with ether and filtered through a pad of Celite. The Celite pad was washed with Et<sub>2</sub>O. The combined filtrate and the washings were concentrated to extrude ether, and the residue mixture was analyzed by <sup>19</sup>F NMR spectroscopy to determine the reaction yields (Table 2).

**Condition B:** Into a 25-mL Schlenk tube equipped with a stir bar were added (phen)Cu(CF<sub>3</sub>)<sub>3</sub> (**3**) (45 mg, 0.1 mmol), boronic acid (**6**) (0.2 mmol), **AgF (0.2 mmol)**, **4 Å MS**, 4,4'-difluorobiphenyl (internal standard; 38 mg, 0.2 mmol). The air in the Schlenk tube was evacuated and backfilled with dry oxygen. Dry DMF (1 mL) was then added by syringe. The contents in the tube were vigorously stirred and heated in an oil bath to **50°C** for 3 hours. The mixture was allowed to cool to room temperature and diluted with ether and filtered through a pad of Celite. The Celite pad was washed with Et<sub>2</sub>O. The combined filtrate and the washings were concentrated to extrude ether, and the residue mixture was analyzed by <sup>19</sup>F NMR spectroscopy to determine the reaction yields (Table 2, marked with <sup>c</sup>).

For another example, Figure S15 shows the <sup>19</sup>F NMR spectrum for the reaction mixture of **3** with *p*-biphenylboronic acid (**6b**), which determines a reaction yield of 92% for the formation of **7b**. Figures S16 and S17 are the <sup>1</sup>H and <sup>19</sup>F NMR spectra for isolated **7b**.



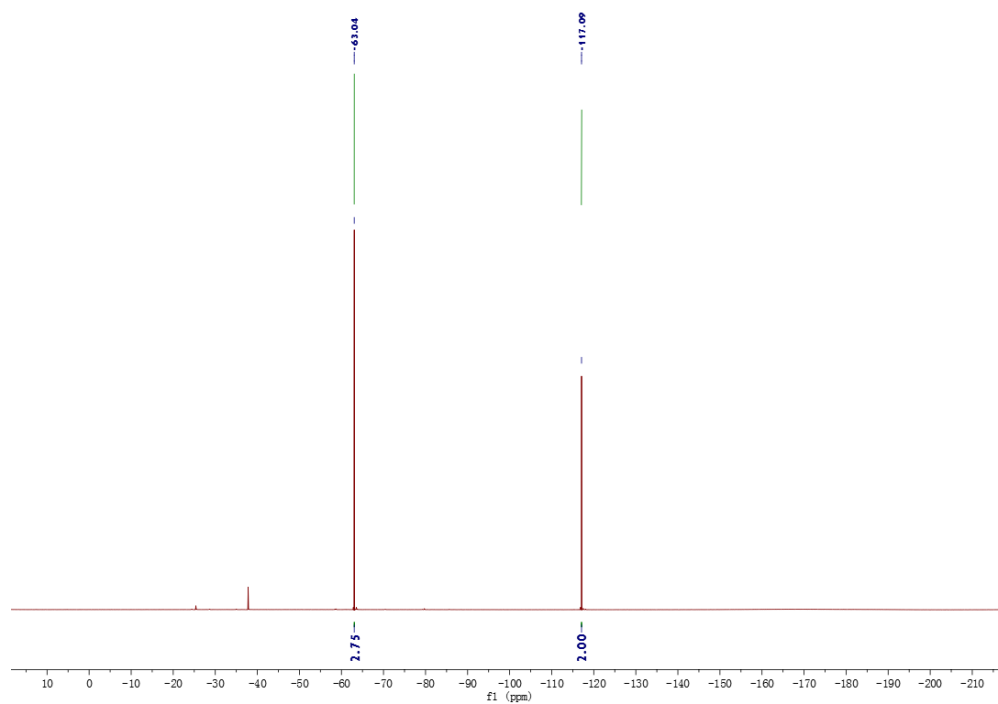

**Figure S15.**  $^{19}\text{F}$  NMR spectrum of reaction solution of **3** with **6b**.

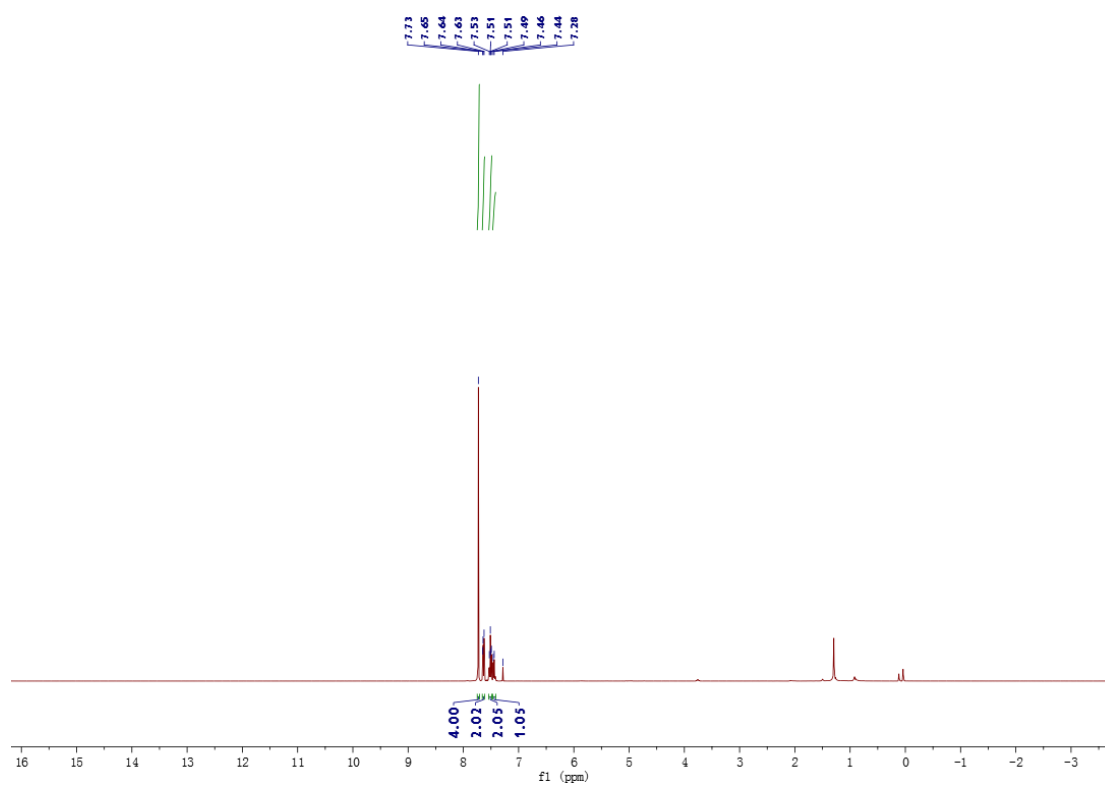

**Figure S16.**  $^1\text{H}$  NMR of 4-phenylbenzotrifluoride (**7b**).

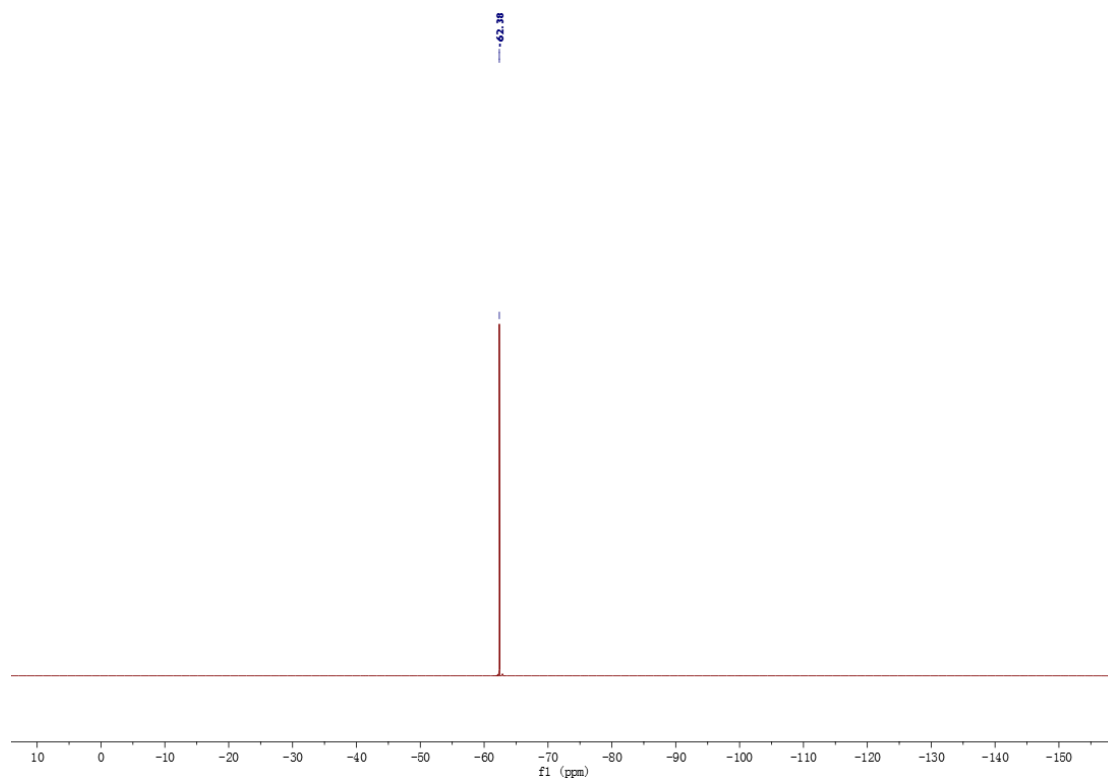

**Figure S17.**  $^{19}\text{F}$  NMR of 4-phenylbenzotrifluoride (**7b**).

### 7.3 Reaction of **2** with boronic acids:

**Table S1.** Summary of reaction of **2** with **6a**

| Entry | Additive                        | Solvent            | T (°C) | Yield (%) |
|-------|---------------------------------|--------------------|--------|-----------|
| 1     | —                               | DMF                | 80     | trace     |
| 2     | KF                              | DMF                | 80     | trace     |
| 3     | AgF                             | DMF                | 80     | 6         |
| 4     | K <sub>3</sub> PO <sub>4</sub>  | DMF                | 80     | 0         |
| 5     | KI                              | DMF                | 80     | 15        |
| 6     | KI                              | Toluene            | 80     | 16        |
| 7     | AgF                             | Toluene            | 80     | 0         |
| 8     | KF                              | Toluene            | 80     | 0         |
| 9     | Cs <sub>2</sub> CO <sub>3</sub> | Toluene            | 80     | 10        |
| 10    | NaOtBu                          | Toluene            | 80     | 7         |
| 11    | KF                              | Toluene            | 80     | 0         |
| 12    | KF                              | CH <sub>3</sub> CN | 50     | 0         |
| 13    | KF                              | DMSO               | 80     | trace     |

Procedure of reaction of **2** with **6a**: Into a 25-mL Schlenk tube equipped with a stir bar were added [phenCu(pph<sub>3</sub>)<sub>2</sub>]<sup>+</sup>[Cu(CF<sub>3</sub>)<sub>4</sub>]<sup>-</sup> (**2**) (55 mg, 0.05 mmol), (4-methoxyphenyl)boronic acid (**6a**) (15 mg, 0.10 mmol), additive (0.10 mmol), and 4,4'-difluorobiphenyl (internal standard; 19 mg, 0.10 mmol). The air in the Schlenk was evacuated and backfilled with dry oxygen. Dry solvent (1 mL) was then added by syringe. The contents in Schlenk tube were vigorously stirred and heated in an oil bath for 18h under specified temperature. The mixture was allowed to cool to room temperature and

diluted with ether and filtered through a pad of Celite. The Celite pad was washed with Et<sub>2</sub>O. The combined filtrate and the washings were concentrated to extrude ether, the residue mixture was analyzed by <sup>19</sup>F NMR spectroscopy to determine the reaction yield. Figure S18 shows the <sup>19</sup>F NMR spectrum for the reaction of **2** with **6a** under reaction conditions of entry 5, Table S1.

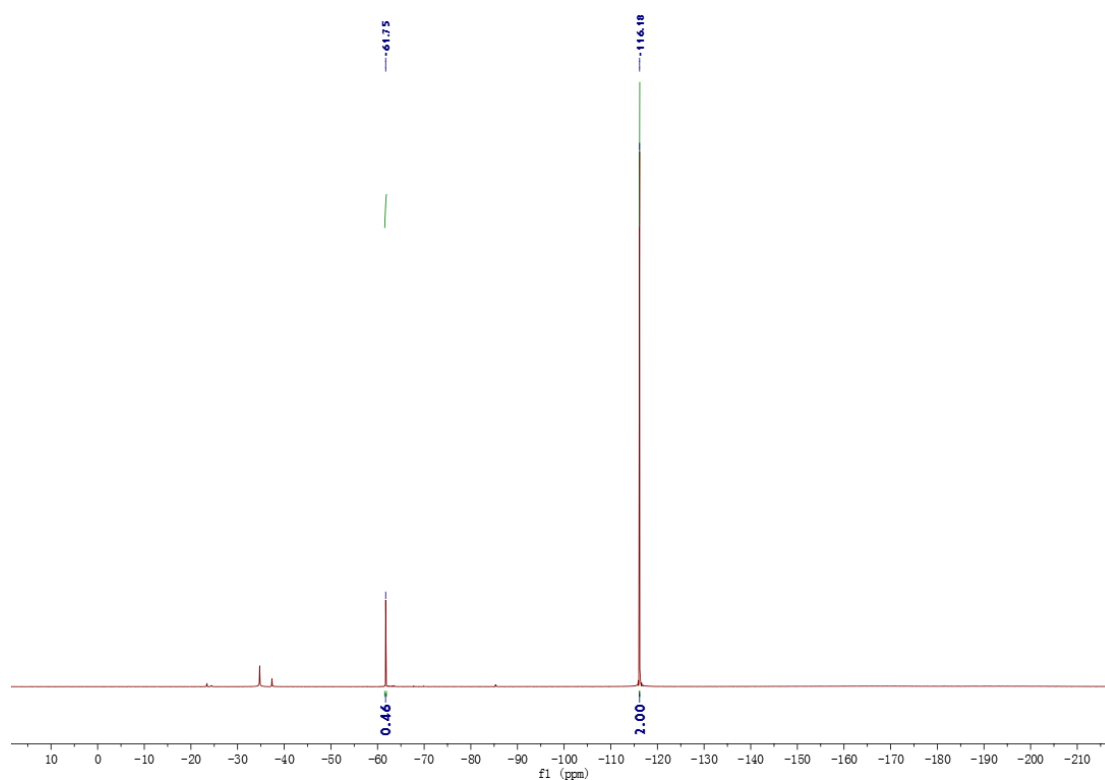

**Figure 18.** <sup>19</sup>F NMR spectrum for the reaction of **2** with **6a** (entry 5, Table S1).
